1           **Genetic Architecture of 11 Major Psychiatric Disorders at Biobehavioral, Functional**  
2           **Genomic, and Molecular Genetic Levels of Analysis**

3  
4  
5 Andrew D. Grotzinger,<sup>1,a</sup> Travis T. Mallard,<sup>1</sup> Wonuola A. Akingbuwa,<sup>2</sup> Hill F. Ip,<sup>2</sup> Mark J.  
6 Adams,<sup>3</sup> Cathryn M. Lewis,<sup>4</sup> Andrew M. McIntosh,<sup>3</sup> Jakob Grove,<sup>5</sup> Søren Dalsgaard,<sup>6</sup> Klaus-  
7 Peter Lesch,<sup>7-9</sup> Nora Strom,<sup>10-12</sup> Sandra M. Meier,<sup>13-14</sup> Manuel Mattheisen,<sup>5,14,15</sup> Anders D.  
8 Børglum,<sup>5,14,15</sup> Ole Mors,<sup>5,16</sup> Gerome Breen,<sup>4,18</sup> iPSYCH, Tourette Syndrome and Obsessive  
9 Compulsive Disorder Working Group of the Psychiatric Genetics Consortium, Bipolar Disorder  
10 Working Group of the Psychiatric Genetics Consortium, Major Depressive Disorder Working  
11 Group of the Psychiatric Genetics Consortium, Schizophrenia Working Group of the Psychiatric  
12 Genetics Consortium, Phil H. Lee,<sup>18-19</sup> Kenneth S. Kendler,<sup>20</sup> Jordan W. Smoller,<sup>18-19</sup> Elliot M.  
13 Tucker-Drob<sup>1,21,\*</sup>, Michel G. Nivard<sup>2,\*</sup>

14  
15 <sup>1</sup> Department of Psychology, University of Texas at Austin, Austin, TX USA

16 <sup>2</sup> Department of Biological Psychology, VU University Amsterdam, Amsterdam, the Netherlands

17 <sup>3</sup> Division of Psychiatry, University of Edinburgh, Royal Edinburgh Hospital, Edinburgh, UK

18 <sup>4</sup> Social, Genetic and Developmental Psychiatry Centre, King's College London, London, UK

19 <sup>5</sup> iPSYCH, The Lundbeck Foundation Initiative for Integrative Psychiatric Research, Denmark

20 <sup>6</sup> National Centre for Register-Based Research, Aarhus University, Aarhus, DK

21 <sup>7</sup> Section of Molecular Psychiatry, Center of Mental Health, University of Würzburg, Würzburg,  
22 Germany

23 <sup>8</sup> Laboratory of Psychiatric Neurobiology, Institute of Molecular Medicine, Sechenov First  
24 Moscow State Medical University, Moscow, Russia

25 <sup>9</sup> Department of Psychiatry and Neuropsychology, School for Mental Health and Neuroscience,  
26 Maastricht University, Maastricht, the Netherlands

27 <sup>10</sup> Department of Psychiatry, Psychosomatics and Psychotherapy, University of Würzburg,  
28 Würzburg, Germany

29 <sup>11</sup> Department of Psychology, Humboldt-Universität zu Berlin, Berlin, Germany

30 <sup>12</sup> Department of Clinical Neuroscience, Karolinska Institutet, Stockholm, Sweden.

31 <sup>13</sup> Department of Psychiatry, Dalhousie University, Nova Scotia, Canada

32 <sup>14</sup> Department of Biomedicine, Aarhus University, Aarhus, Denmark

33 <sup>15</sup> Center for Genomics and Personalized Medicine, Aarhus, Denmark

34 <sup>16</sup> Psychosis Research Unit, Aarhus University Hospital, Aarhus, Denmark

35 <sup>17</sup> NIHR Maudsley Biomedical Research Centre, King's College London, London, UK

36 <sup>18</sup> Psychiatric and Neurodevelopmental Genetics Unit (PNGU) and the Center for Genomic  
37 Medicine, Massachusetts General Hospital, Boston, MA, USA

38 <sup>19</sup> Stanley Center for Psychiatric Research, Broad Institute of MIT and Harvard, Cambridge, MA,  
39 USA

40 <sup>20</sup> Department of Psychiatry, Virginia Commonwealth University, Richmond, VA, USA

41 <sup>21</sup> Population Research Center, University of Texas at Austin, Austin, TX USA

42

43 <sup>a</sup> Correspondence to Andrew D. Grotzinger ([agrotzin@utexas.edu](mailto:agrotzin@utexas.edu))

44 \* These authors jointly directed this work

45

46

47

48

49

50

51

52

53

54

55

56

57

58

59

60

61

62

63

64

## Abstract

We systematically interrogate the joint genetic architecture of 11 major psychiatric disorders at biobehavioral, functional genomic, and molecular genetic levels of analysis. We identify four broad factors (Neurodevelopmental, Compulsive, Psychotic, and Internalizing) that underlie genetic correlations among the disorders, and test whether these factors adequately explain their genetic correlations with biobehavioral traits. We introduce Stratified Genomic Structural Equation Modelling, which we use to identify gene sets and genomic regions that disproportionately contribute to pleiotropy, including protein-truncating variant intolerant genes expressed in excitatory and GABAergic brain cells that are enriched for pleiotropy between disorders with psychotic features. Multivariate association analyses detect a total of 152 (20 novel) independent loci which act on the four factors, and identify nine loci that act heterogeneously across disorders within a factor. Despite moderate to high genetic correlations across all 11 disorders, we find very little utility of, or evidence for, a single dimension of genetic risk across psychiatric disorders.

65  
66  
67  
68  
69  
70  
71  
72  
73  
74  
75  
76  
77  
78  
79  
80  
81  
82  
83  
84  
85  
86  
87  
88  
89  
90  
91  
92  
93  
94  
95  
96  
97  
98  
99  
100  
101  
102  
103  
104  
105  
106  
107  
108  
109  
110

111 **Genetic Architecture of 11 Major Psychiatric Disorders at Biobehavioral, Functional**  
112 **Genomic, and Molecular Genetic Levels of Analysis**  
113

114 Psychiatric disorders aggregate both within individuals *and* families. Offspring of parents  
115 with psychiatric illness are at higher risk for developing a broad range of psychiatric disorders,  
116 not just the specific parental disorder.<sup>1-3</sup> Moreover, approximately half of individuals with a  
117 psychiatric illness will concurrently meet criteria for a second disorder,<sup>4</sup> and around 40% of  
118 individuals will meet diagnostic criteria for four or more psychiatric disorders in their lifetime.<sup>5</sup>  
119 Comorbidity is the norm, rather than the exception. Factor analyses that have modeled these  
120 comorbidity patterns consistently identify a transdiagnostic *p*-factor representing general risk  
121 across psychiatric disorders, along with several intermediate factors representing more specific  
122 clusters of psychiatric risk (*e.g.*, psychotic disorders, mood disorders).<sup>6-8</sup> Modern genomics has  
123 built on these findings to begin to elucidate the genetic basis for shared risk across disorders,<sup>9,10</sup>  
124 with new statistical tools paired with genome-wide association study (GWAS) data being used to  
125 identify pleiotropic variants across disorders.<sup>11,12</sup> Most recently, Lee *et al.* (2019)<sup>13</sup> identified  
126 three major dimensions of genetic risk sharing (Neurodevelopmental, Compulsive and  
127 Psychotic) across eight psychiatric disorders, raising the possibility that key mechanisms of  
128 individual disorder risk may operate through these more general factors. Importantly, however,  
129 neither phenotypic comorbidity nor genetic correlations among disorders are by themselves  
130 sufficient for establishing the etiological, diagnostic, or therapeutic utility of the identified  
131 factors.

132 Here, we apply Genomic Structural Equation Modelling (Genomic SEM) to GWAS data  
133 (average total sample size per disorder = 156,771 participants; range = 9,725 - 802,939), to  
134 examine the genetic architecture of eleven major psychiatric disorders, across biobehavioral,  
135 functional genomic, and molecular genetic levels of analysis. Genomic SEM is able to  
136 investigate the multivariate genetic architecture across disorders that could not be measured in  
137 the same sample, thereby offering novel insights across the diagnostic spectrum. We begin by  
138 estimating several potential genomic factor models, and identify four broad factors that index  
139 shared genetic liability within and across disorders. We then evaluate the utility of these factors  
140 using a multi-step approach. First, we test the extent to which the factors adequately explain the  
141 patterns of genetic correlation between psychiatric disorders and a wide range of external  
142 biobehavioral traits specifically selected to represent processes disrupted in psychiatric illness,  
143 such as socioeconomic outcomes and cognition. Second, we introduce Stratified Genomic SEM,  
144 which we apply to identify gene sets and categories (*e.g.*, protein-truncating variant-intolerant  
145 genes, low MAF SNPs) for which genetic sharing among the disorders, as indexed by each of the  
146 factors, is enriched. Finally, we capitalize on Genomic SEM for multivariate GWAS to identify  
147 loci that confer risk to multiple disorders via the factors, along with loci that operate  
148 heterogeneously across disorders within a given factor. As we observe particularly  
149 heterogeneous effects of loci related to problematic alcohol use, we estimate Mendelian  
150 randomization models in which pleiotropy is explained by both four latent factors and direct  
151 causal influences of problematic alcohol use liability on liability for other psychiatric disorders.  
152 Collectively, these results offer critical insights into the shared and disorder-specific mechanisms  
153 of genetic risk for psychiatric disease.

154  
155  
156

## Results

### Factor Analysis of Genetic Covariance across 11 Psychiatric Traits

We curated the most recent European ancestry GWAS summary data for eleven major psychiatric disorders: attention-deficit/hyperactivity disorder (ADHD),<sup>14</sup> problematic alcohol use (ALCH),<sup>15</sup> anorexia nervosa (AN),<sup>16</sup> autism spectrum disorder (AUT),<sup>17</sup> anxiety disorders (ANX),<sup>18,19</sup> bipolar disorder (BIP),<sup>20</sup> major depressive disorder (MDD),<sup>21,22</sup> obsessive compulsive disorder (OCD),<sup>23</sup> post-traumatic stress disorder (PTSD),<sup>24,25</sup> schizophrenia (SCZ),<sup>26</sup> and Tourette syndrome (TS).<sup>27</sup> Data were derived from a range of sources, including the Psychiatric Genomics Consortium (PGC), UK Biobank (UKB), 23andMe, Inc., and iPSYCH (Table S1).

A heatmap of genetic correlations estimated using LD Score regression (LDSC)<sup>9</sup> across the 11 traits indicates pervasive overlap across disorders, with more pronounced clustering observed among certain constellations of disorders (Figure 1a; Table S2 for LDSC results). We formally modeled this LDSC correlation structure using Genomic SEM by first estimating a series of exploratory factor analyses (EFAs), where the disorders freely load on 2,3,4, or 5 factors, in odd numbered autosomes only. We subsequently fit a series of confirmatory factor analyses (CFAs) specified on the basis of these EFAs, for which model fits were compared using even autosomes only (**Method**). Using odd and even autosome covariance matrices for the EFAs and CFAs, respectively, provided a form of cross-validation to guard against model overfitting.

The best fitting CFA model (for even autosomes:  $\chi^2[33] = 126.85$ , AIC = 192.85, CFI = .955, SRMR = .078; Table S47 for fit statistics of all models) consisted of four correlated factors (Figure 1b) and, importantly, also fit the data well when fit using all autosomes ( $\chi^2[33] = 161.66$ , AIC = 227.66, CFI = .975, SRMR = .072). Factor 1 consists of disorders characterized largely by compulsive behaviors (AN, OCD, TS). Factor 2 is characterized by disorders that may have psychotic features (SCZ, BIP). Factor 3 is characterized primarily by childhood-onset neurodevelopmental disorders (ADHD, AUT), but might also be conceptualized as a sensory processing/hyperarousal factor to the extent that PTSD also loads strongly on this factor. Factor 4 is characterized by internalizing disorders (ANX, MDD). These results, with additional disorders and larger GWAS sample sizes, largely replicate findings from PGC Cross-Disorder Group 2 (PGC-CDG2).<sup>13</sup> More specifically, PGC-CDG2 reported factors representing compulsive, psychotic, and neurodevelopmental disorders, which correspond closely to our first three factors. Our identification of an Internalizing factor can largely be attributed to the inclusion of ANX, and to a lesser extent PTSD, in addition to MDD in the current analysis. It is of note that both TS and ALCH evinced the lowest factor loadings, indicating the most distinct genetic etiology among the 11 disorders in this model.

Cai *et al.* (2020)<sup>28</sup> have reported that psychiatric phenotypes derived using minimal phenotyping (defined as “individuals’ self-reported symptoms, help seeking, diagnoses or medication”) may produce GWAS signals of low specificity. We therefore conducted a sensitivity analysis in which we excluded GWAS summary statistics for MDD, ANX, ADHD and ALCH that included cohorts with self-report diagnoses or symptoms and refit the correlated factor model. This produced highly similar parameter estimates to those obtained when using all cohorts (Supplementary Results; Figure S1).

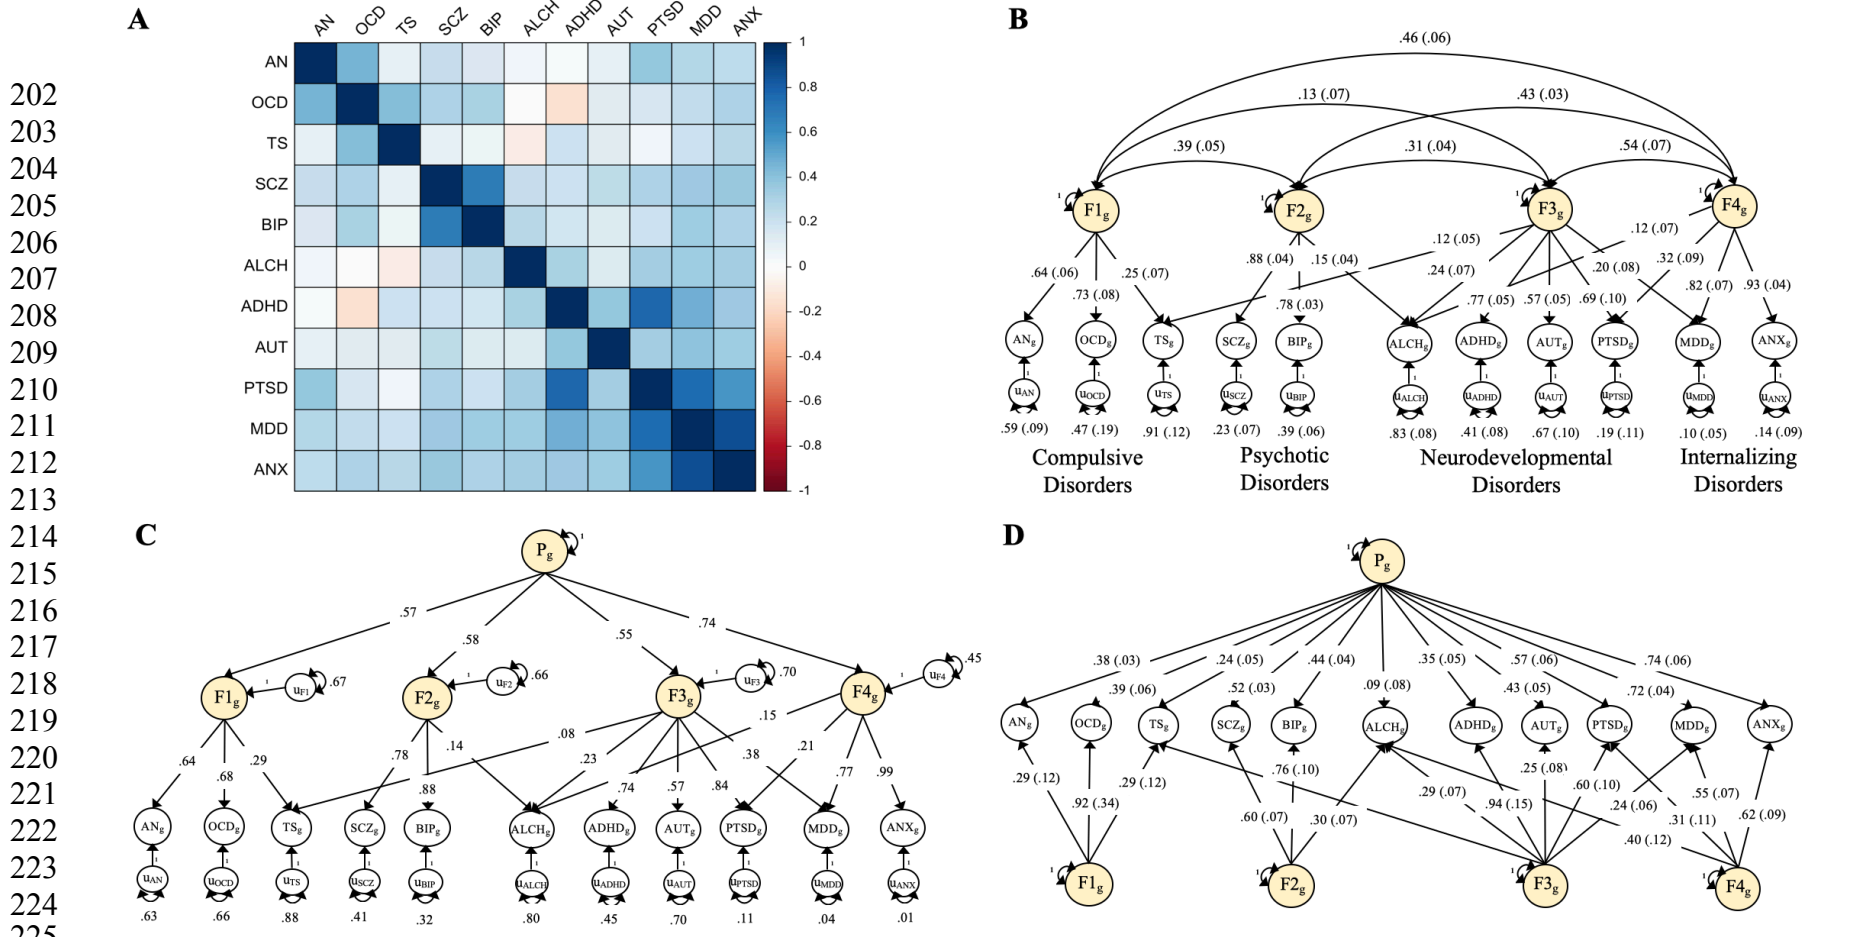

226 **Figure 1. Multivariate Genetic Architecture of 11 Psychiatric Disorders.** **Panel A:** Genetic correlations estimated using LDSC. **Panel B:** Standardized results  
227 for the correlated factors. **Panel C:** Standardized results from the hierarchical factor model. **Panel D:** Standardized results from the bifactor model. The genetic  
228 components of disorders and common genetic factors of disorders are inferred variables that are represented as circles. Regression relationships between  
229 variables are depicted as one-headed arrows pointing from the independent variables to the dependent variables. Covariance relationships between  
230 variables are represented as two-headed arrows linking the variables. (Residual) variances of a variable are represented as a two-headed arrow connecting the variable to itself;  
231 for simplicity residuals of the indicators are not depicted for the bifactor model. ADHD = attention-deficit/hyperactivity disorder; OCD = obsessive-compulsive  
232 disorder; TS = Tourette syndrome; PTSD = post-traumatic stress disorder; AN = anorexia nervosa; AUT = autism spectrum disorder; ALCH = problematic  
233 alcohol use; ANX = anxiety; MDD = major depressive disorder; BIP = bipolar disorder; SCZ = schizophrenia.



234 The moderate, positive factor intercorrelations observed in Figure 1, in combination with  
235 a prior literature indicating a high-order transdiagnostic “*p*-factor”, suggest that a hierarchical  
236 factor structure with a single, high-order factor is plausible. Indeed, such a model fit the data  
237 well (Figure 1c; even autosomes:  $\chi^2[35] = 173.45$ , AIC = 235.45, CFI = .933, SRMR = .091; all  
238 autosomes:  $\chi^2[35] = 171.37$ , AIC = 233.37, CFI = .974, SRMR = .079). In this model the *p*-  
239 factor explained the greatest proportion of variance in the Internalizing disorders factor (55%)  
240 and relatively similar proportions of variance in the remaining three factors (30%-34%). We  
241 retain these two key models—the four correlated factors model and the hierarchical factor  
242 model—to examine the remaining research questions using data from all autosomes.  
243

## 244 Genetic Correlates of Psychiatric Genetic Factors with External Biobehavioral Traits

245  
246 A factor model implies a specific causal model, where the factors identified are thought  
247 to causally influence their indicators, in this case the 11 psychiatric disorders. Therefore,  
248 identified factor structures also imply a certain genetic relationship between external traits and  
249 the individual disorders. The degree to which the observed genetic correlation between traits and  
250 the psychiatric disorders respect the relationships implied by the factors can be viewed as a  
251 validation, or rejection, of the factor structure at one level of analysis. To this end, we examined  
252 patterns of correlations across the psychiatric factors and 49 biobehavioral traits relevant to  
253 socioeconomic status, anthropomorphic indices, personality, cognitive outcomes, health and  
254 disease, risky behavior, and neuropsychiatric outcomes,<sup>29</sup> 101 metrics of brain morphology,<sup>30</sup>  
255 and circadian activity across 24 hours,<sup>31</sup> for a total of 174 external traits. Results for brain  
256 morphology are presented in the Online Supplement (Figures S3-S4; Table S3), as none of these  
257 associations were significant at a Bonferroni corrected threshold for 174 tests ( $p < 2.87E-4$ ).  
258

259 To evaluate the extent to which each of the 49 biobehavioral traits operated through the  
260 factor, we calculated  $\chi^2$  difference tests comparing a model in which the trait predicted the factor  
261 only, to one in which it predicted the individual disorders of a given factor (or, the first-order  
262 factors, in the case of analyses using the *p*-factor model; Figure 2; Figure S5). We term the  $\chi^2$   
263 difference across these two models the  $Q_{\text{trait}}$  heterogeneity index, where a significant index  
264 indicates that the pattern of associations between the individual disorders and the external trait is  
265 not well-accounted for by the factor. Using a Bonferroni correction, 7/49 correlations were  
266 significant for  $Q_{\text{trait}}$  for the Compulsive factor, 18/49 for the Psychotic factor, 39/49 for the  
267 Neurodevelopmental factor, 17/49 for the Internalizing factor, and 38/49 for the *p*-factor (Table  
268 S4). Excluding significant  $Q_{\text{trait}}$  correlations (i.e., correlations not operating through the factor),  
269 and using the same Bonferroni correction, 17 correlations were significant for the Compulsive  
270 factor, 12 for the Psychotic factor, 5 for the Neurodevelopmental factor, 20 for the Internalizing  
271 factor, and 3 for the *p*-factor.

272 As expected, all factors were positively genetically associated with psychiatric  
273 phenotypes from outside studies, including the cross-disorder iPSYCH results, and negatively  
274 genetically correlated with indices of positive mental health (e.g., subjective well-being, family  
275 relationship satisfaction; Figure S6). In the remainder of this section, we generally describe  
276 patterns of genetic correlations with external biobehavioral traits outside of the psychiatric  
277 domain.  
278  
279  
280

281  
282  
283  
284  
285  
286  
287  
288  
289  
290  
291  
292  
293  
294  
295  
296  
297  
298  
299  
300  
301  
302  
303  
304  
305  
306  
307  
308  
309  
310  
311  
312  
313  
314  
315  
316  
317  
318  
319  
320  
321  
322  
323  
324  
325  
326  
327  
328  
329  
330  
331

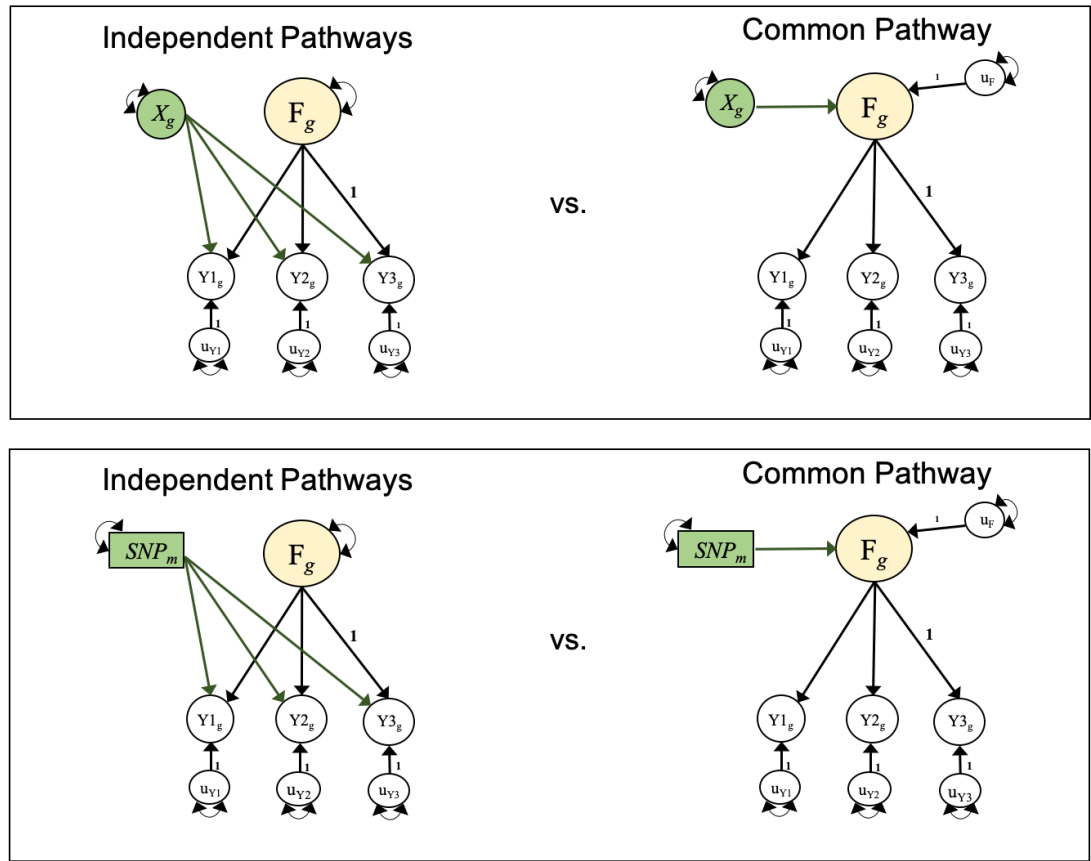

**Figure 2. Model Comparisons for Producing Q metrics.** Unstandardized path diagrams for *common pathway* (left) and *independent pathways* (right) models used to compute the Genomic SEM heterogeneity statistics for associations with external traits ( $Q_{\text{Trait}}$ , top) and individual SNPs ( $Q_{\text{SNP}}$ , bottom). In this example,  $F$  is a common genetic factor of the genetic components of 3 GWAS phenotypes ( $Y_1$ - $Y_3$ ). Observed variables are represented as squares and latent variables are represented as circles. The genetic component of each phenotype is represented with a circle as the genetic component is a latent variable that is not directly measured, but is inferred using LDSC. SNPs are directly measured, and are therefore represented as squares. Single-headed arrows are regression relations, and double-headed arrows are variances. Paths labeled 1 are fixed to 1 for model identification purposes. All unlabeled paths represent freely estimated model parameters.  $Q$  represents the decrement in model fit of the *common pathway* model relative to the more restrictive *independent pathways* model.  $Q$  is a  $\chi^2$  distributed test statistic with  $k-1$  degrees of freedom, representing the difference between the  $k$  SNP-phenotype or Trait-phenotype  $b$  coefficients in the independent pathways model and the 1 SNP-factor or Trait-factor  $b$  coefficient in the *common pathway* model.  $Q_{\text{Trait}}$  indexes whether the pattern of genetic associations between the genetic component of an external trait (depicted as  $X_g$ ) and the individual disorders is well accounted for by a given factor.  $Q_{\text{SNP}}$  indexes whether the associations between an individual SNP (depicted as  $\text{SNP}_m$ ) and the individual disorders is well accounted for by the factor. For simplicity, we depict a stylized representation containing only one factor and three disorders. The full models used to derive  $Q_{\text{Trait}}$  and  $Q_{\text{SNP}}$  for the empirical analyses reported in this paper are presented in Figures S5 and S38.



Stratified Genomic SEM

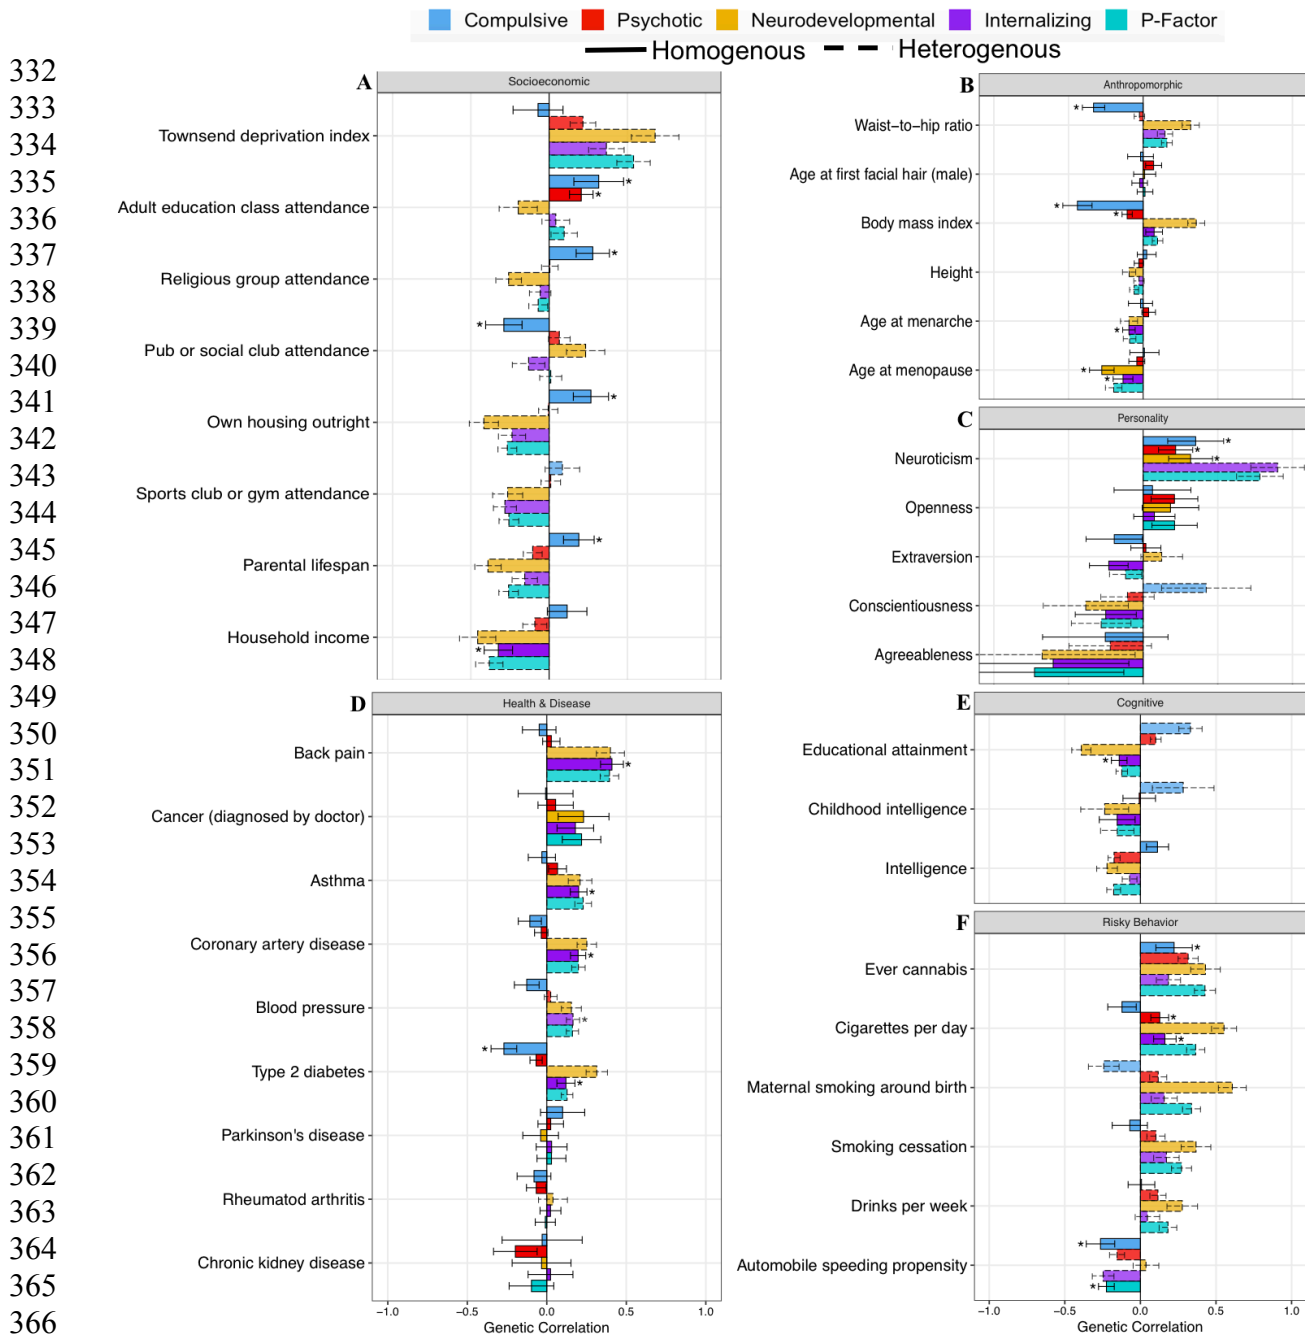

367 **Figure 3. Genetic Correlations with Complex Traits across Psychiatric Factors.** Panels depict genetic correlations with  
 368 complex traits of interest for the four psychiatric factors from the correlated factors model and the second-order, *p*-factor from  
 369 the hierarchical model. Genetic correlations are shown for socioeconomic (**Panel A**), anthropomorphic (**Panel B**), personality  
 370 (**Panel C**), health and disease (**Panel D**), cognitive (**Panel E**), and risky behavior outcomes (**Panel F**). Bars depicted with a  
 371 dashed outline were significant at a Bonferroni corrected threshold for model comparisons indicating heterogeneity across the  
 372 factor indicators in their genetic correlations with the outside trait. Error bars reflect 95% confidence intervals. Bars depicted  
 373 with an \* above produced a genetic correlation that was significant at a Bonferroni corrected threshold and were not  
 374 significantly heterogeneous.

375  
 376  
 377  
 378

379 The Compulsive disorders factor was negatively genetically correlated with  
380 anthropomorphic traits (BMI, waist-to-hip ratio) and risk-taking behaviors (e.g., automobile  
381 speeding, pub attendance; Figure 3). Educational attainment (EA) evinced a particular pattern of  
382 genetic associations with the individual compulsive disorders that were inconsistent with their  
383 operation via the Compulsive disorders factor, where AN was more positively associated relative  
384 to OCD and TS (Figure S7).

385 The Psychotic disorders factor was negatively associated with obesity related outcomes  
386 (BMI, Type 2 diabetes) and positively associated with neuroticism. Phenotypes whose patterns  
387 of genetic associations with the individual disorders were inconsistent with their operation via  
388 the Psychotic disorders factor were substance use phenotypes (e.g., drinks per week, cannabis  
389 use), for which genetic associations with SCZ were more pronounced than with BIP, and  
390 cognitive (e.g., EA) and risk-taking phenotypes (e.g., automobile speeding), for which BIP  
391 exhibited more pronounced positive associations.

392 The Neurodevelopmental disorders factor was genetically associated with earlier age at  
393 menopause. All other external correlates outside of the psychiatric domain that survived  
394 Bonferroni-correction exhibited patterns of associations with the individual neurodevelopmental  
395 disorders that were inconsistent with their operation via the factor. Cognitive (e.g., educational  
396 attainment, intelligence), anthropometric (e.g., BMI), and economic outcomes (e.g., Townsend  
397 deprivation) had the strongest disorder-specific associations, with positive associations observed  
398 for AUT, and negative associations for PTSD and ADHD. The Neurodevelopmental disorders  
399 factor therefore performed poorly at this level of validation due largely to divergent patterns for  
400 AUT.

401 The Internalizing disorders factor exhibited negative genetic associations with  
402 extraversion, age at menopause, EA, and positive associations with various adverse health  
403 outcomes (e.g., asthma, back pain, coronary artery disease). Phenotypes with the strongest  
404 disorder-specific associations included socioeconomic phenotypes (e.g., owning a house  
405 outright), which tended to exhibit more pronounced negative genetic associations with MDD  
406 than with ANX.

407 The  $p$ -factor exhibited a homogenous genetic correlation with automobile speeding  
408 propensity. All other external non-psychiatric correlates that survived Bonferroni-correction  
409 exhibited patterns of associations with the first order psychiatric genetic factors that were  
410 inconsistent with their operation via the  $p$ -factor. The genetic associations with EA deviated most  
411 strongly from the hierarchical factor structure. These patterns of widespread heterogeneity in  
412 genetic correlations with external phenotypes undermine the utility of the  $p$ -factor.

413  
414 *Accelerometer Data.* Atypical patterns of physical movement throughout the 24-hour cycle may  
415 reflect disturbances in basic homeostatic processes that confer transdiagnostic psychiatric risk.<sup>32</sup>  
416 Using accelerometer data from UKB,<sup>31</sup> we next examined genetic correlations between the  
417 individual psychiatric traits and factors and physical movement across a 24-hour period (Figure  
418 4; Table S5). The same  $Q_{\text{trait}}$  indices described for complex traits were used to determine whether  
419 patterns of associations with hours of movement were well-accounted for by the factors. Using a  
420 Bonferroni correction for 174 tests, 1 correlation was significant for  $Q_{\text{trait}}$  for the Compulsive  
421 factor, 2 for the Psychotic factor, 12 for the Neurodevelopmental factor, 7 for the Internalizing  
422 factor, and 18 for the  $p$ -factor. Excluding any significant  $Q_{\text{trait}}$  correlations, and using the same  
423 Bonferroni correction, 8 correlations were significant for the Compulsive factor, 4 for the

424 Psychotic factor, 1 for the Neurodevelopmental factor, 6 for the Internalizing factor, and 2 for the  
425  $p$ -factor.

426 Compulsive disorders were positively genetically correlated with physical movement  
427 throughout the daylight hours and into the evening. Psychotic disorders were positively  
428 genetically correlated with excess movement in the early morning hours. The pattern of  
429 associations deviated from the factor structure largely in the daylight and evening hours, with  
430 larger positive genetic correlations observed for BIP. Genetic correlations with movement  
431 throughout the day were heterogeneous across disorders that load on the Neurodevelopmental  
432 disorders factor. This was primarily due to unique associations for AUT, for which positive  
433 genetic correlations were observed during the evening hours relative to negative correlations for  
434 other disorders. Internalizing disorders were negatively genetically correlated with movement  
435 throughout the daylight and earlier evening hours.

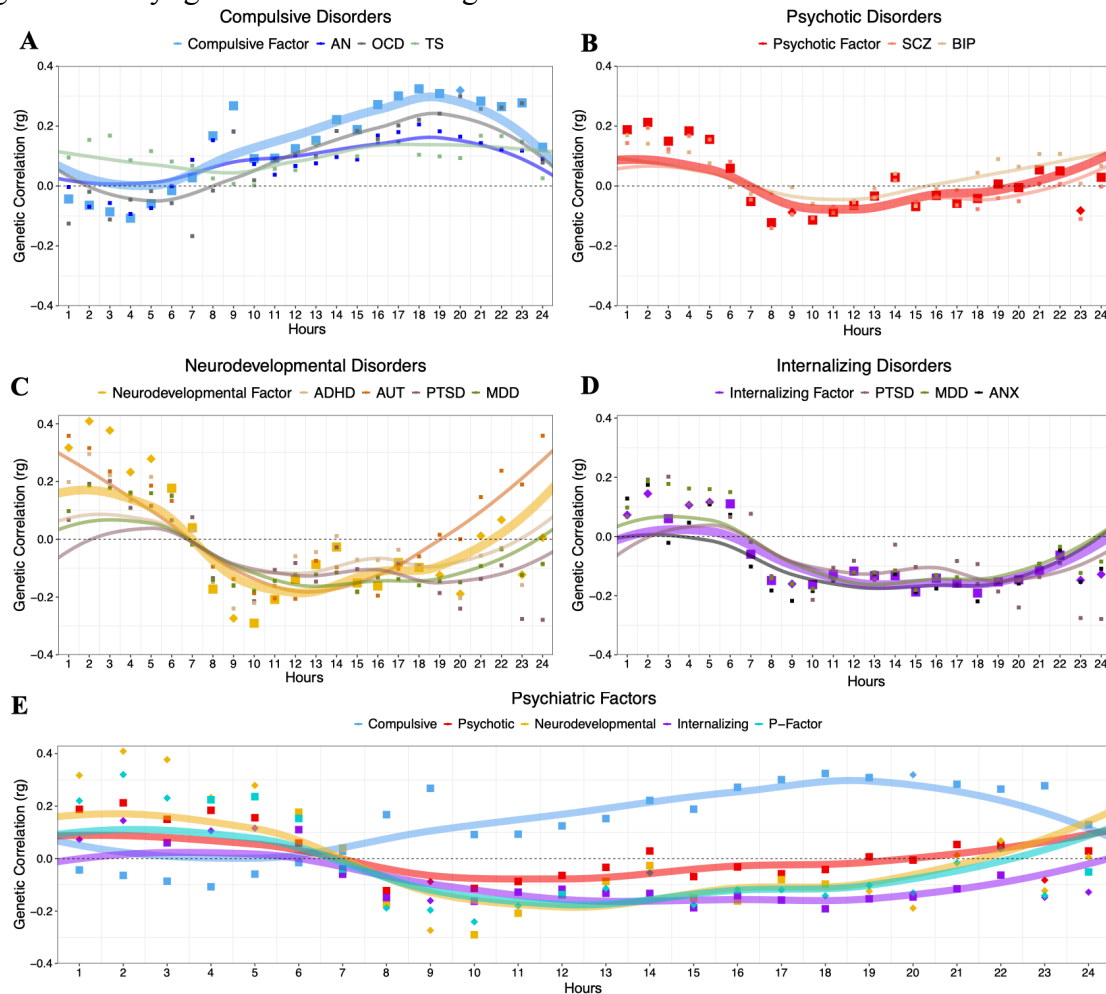

464 **Figure 4. Genetic Correlations with Accelerometer Data across Psychiatric Disorders and Factors.** Panels depicts  
465 genetic correlations between accelerometer-based average total hourly movement within the 24-hr day beginning at midnight  
466 ( $N \sim 95,000$ ) and each psychiatric disorder, along with the respective psychiatric factor, for the compulsive disorders (**Panel A**),  
467 psychotic disorders (**Panel B**), neurodevelopmental disorders (**Panel C**), internalizing disorders (**Panel D**), and psychiatric  
468 factors (**Panel E**). Across all panels, the psychiatric factors are depicted with larger points and lines. For the psychiatric  
469 factors, points depicted as diamonds were significant at a Bonferroni corrected threshold for model comparisons indicating  
470 heterogeneity across the factor indicators in their genetic correlations with that particular time point. As it loaded on three  
471 different factors (cf. Figure 1), ALCH was not assigned to a panel above. Lines represent loess regression lines estimated in  
472 *ggplot2*.

## 473 **Genetic Enrichment of Psychiatric Genetic Factors (Stratified Genomic SEM)**

474

475 We developed Stratified Genomic SEM to allow the basic principles of Genomic SEM to  
476 be applied to genetic covariance matrices estimated in different gene sets and categories  
477 (**Method**). These gene sets and categories, collectively referred to as annotations, can be  
478 constructed based on a variety of sources, such as collateral gene expression data obtained from  
479 single-cell RNA sequencing. Such an analysis goes beyond methods such as Stratified LDSC<sup>33</sup>  
480 that estimate enrichment of heritability for particular traits within functional annotations. Rather,  
481 Stratified Genomic SEM allows us to ask whether pleiotropic loci are enriched within particular  
482 annotations.

483 We fit Stratified Genomic SEM models that allowed variances of the common genetic  
484 factors, and disorder-specific effects, to vary across annotations to examine whether the degree  
485 of risk sharing and differentiation is enriched across disorders. Enrichment is defined as the ratio  
486 of the proportion of genome-wide risk sharing indexed by the annotation to that annotation's size  
487 as a proportion of the genome (**Method**). The null, corresponding to no enrichment, is a ratio of  
488 1.0, with values above 1.0 indicating enrichment of pleiotropic signal within a functional  
489 annotation. We included functional annotations from the most recent 1000 Genomes Phase 3  
490 BaselineLD Version 2.2,<sup>34</sup> for tissue specific histone marks based on data from the Roadmap  
491 Epigenetics Project,<sup>35</sup> for specific gene expression constructed based on RNA sequencing data  
492 from human tissues from GTEx,<sup>36</sup> and for annotations constructed from human, mouse, and rat  
493 microarray experiments (*i.e.*, DEPICT).<sup>37</sup> In addition, we created 29 annotations to examine the  
494 interaction between expression patterns for protein-truncating variant (PTV)-intolerant (PI)  
495 genes (obtained from the Genome Aggregation Database; gnomAD<sup>38</sup>), and human brain cells in  
496 the hippocampus and prefrontal cortex (obtained from GTEx<sup>39</sup>). In total, enrichment analyses  
497 were based on 168 binary annotations. Using a Bonferroni correction for 168 tests, we identify  
498 40 annotations that were significantly enriched for the Psychotic disorders factor, 1 annotation  
499 (conserved primate) for the Neurodevelopmental disorders factor, 4 annotations for the  
500 Internalizing disorders factor, and 38 annotations for the *p*-factor (Table S6).

501 PI results revealed that these annotations were particularly enriched for the Psychotic  
502 disorders factor, with 5 out of the 10 most significantly enriched gene sets falling in this category  
503 (Figure 5). Moreover, we observe that specific intersections of PI and brain cells were more  
504 enriched than others, with the interaction of PI genes and genes expressed for excitatory (*e.g.*,  
505 hippocampal CA1 neurons) and GABAergic neurons displaying the most significant enrichment  
506 for the Psychotic disorders factor. PI genes reflect a broad functional class that has been found to  
507 confer risk across a wide array of disorders (*e.g.*, AUT, ADHD, BIP and SCZ<sup>40</sup>). These findings  
508 thus offer insight into neuronal subcategories within the overarching PI gene set that are  
509 specifically associated with shared risk across BIP and SCZ.

510 We find that shared genetic variance across disorders, as estimated by a higher order *p*-  
511 factor, is enriched in conserved annotations (*e.g.*, conserved primate; Genomic Evolutionary  
512 Rate Profiling [GERP]) and that enrichment increases from low to high MAF alleles (Figure S8-  
513 S14). This indicates that previous reports of similar findings for individual disorders<sup>33,41</sup> may  
514 reflect enrichment of pleiotropic variants that are broadly relevant for many disorders. The most  
515 enriched annotations for the Neurodevelopmental and Internalizing disorders factors were fetal  
516 female brain DNase and fetal male brain H3K4me1, respectively, both of which have been  
517 previously reported to be enriched for general liability across psychiatric disorders.<sup>42</sup>

518

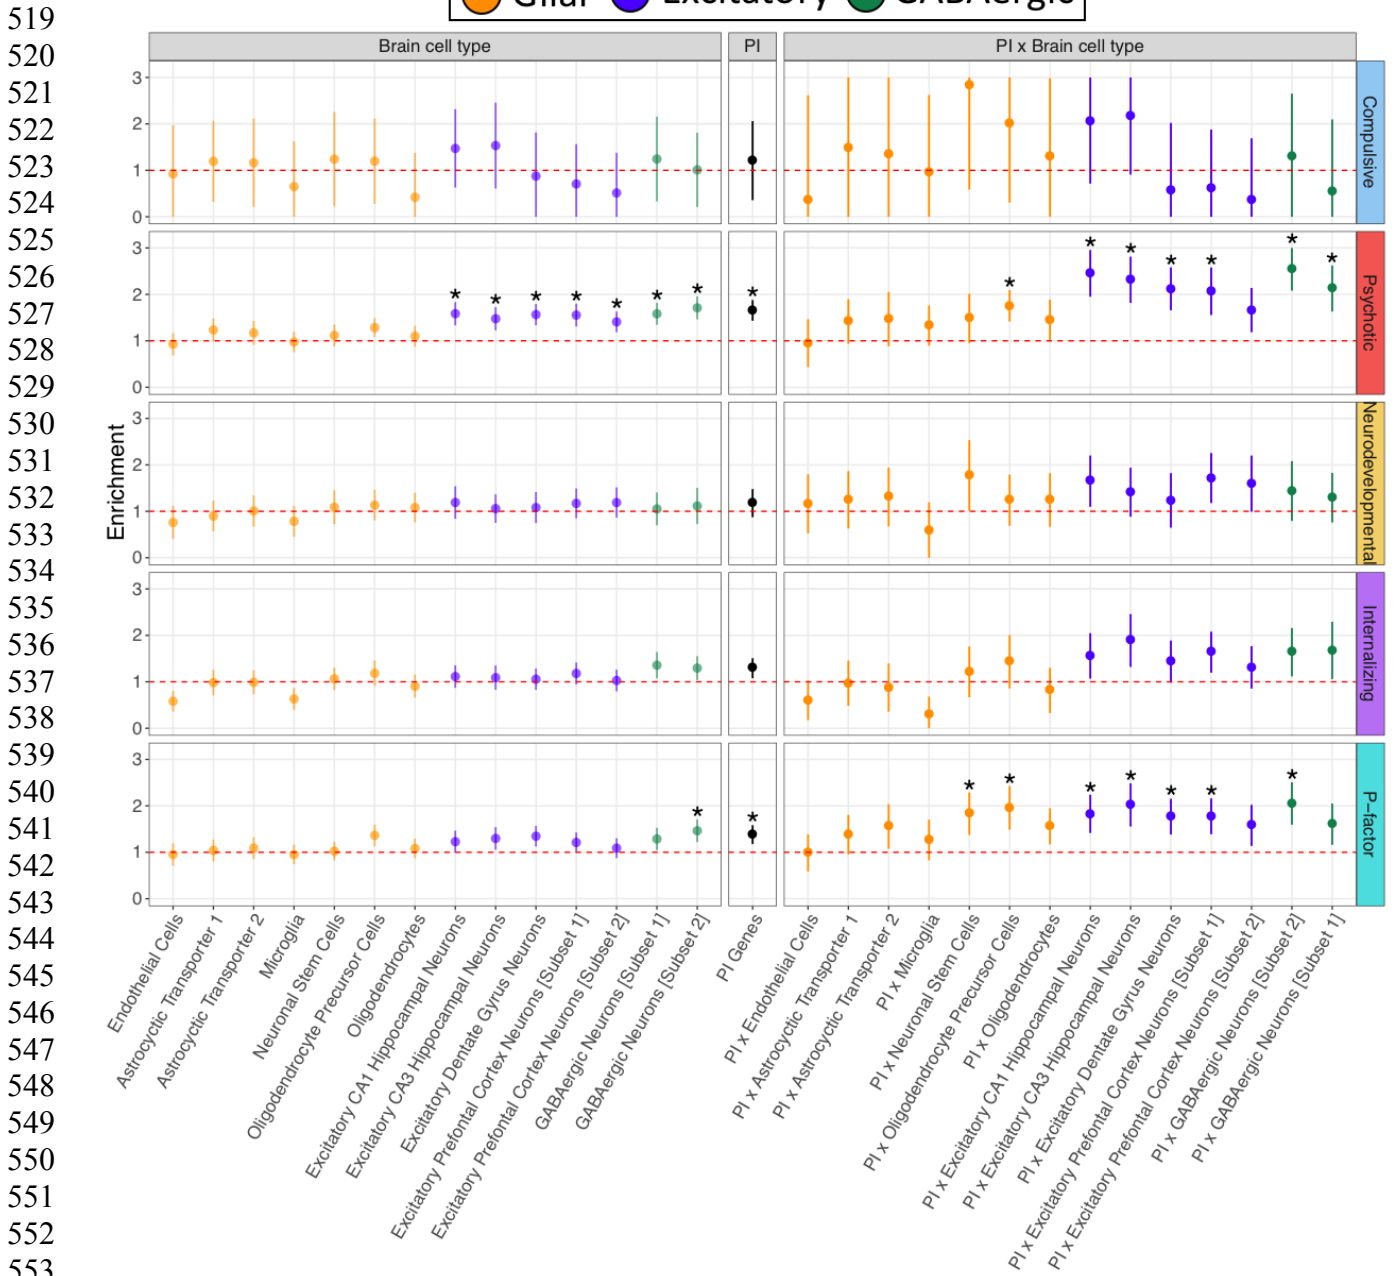

**Figure 5. Genetic Enrichment of Factors for Brain Cell, PI, and PI x Brain Cell Annotations.** Figure depicts enrichment of the four factors from correlated factors model and the second-order, *p*-factor from the hierarchical factor model for the brain cell genes, protein-truncating variant (PTV)-intolerant (PI) genes, and PI x brain cell gene annotations. Enrichment is indexed by the ratio of the proportion of genome-wide relative risk sharing indexed by the annotation to that annotation's size as a proportion of the genome. The red dashed line reflects the null ratio of 1.0, corresponding to no enrichment. Ratios greater than 1.0 indicate enrichment of pleiotropic signal whereas ratios less than 1.0 indicate depletion of pleiotropic signal. Error bars depict 95% confidence intervals. Points depicted with a \* were significantly enriched at a Bonferroni corrected threshold. To maintain equal scaling purposes across all panels, error bars are capped at 3 and 0 for the Compulsive disorders factor; no annotations were significant for this factor.

519  
520  
521  
522  
523  
524  
525  
526  
527  
528  
529  
530  
531  
532  
533  
534  
535  
536  
537  
538  
539  
540  
541  
542  
543  
544  
545  
546  
547  
548  
549  
550  
551  
552  
553  
554  
555  
556  
557  
558  
559  
560  
561  
562  
563  
564  
565



566 For specific tissues, we observe that brain regions are generally enriched, as is also observed for  
567 other complex traits,<sup>43</sup> but were most enriched for the Psychotic disorders factor.

568 Results for genetic enrichment of the residuals of the psychiatric factors after accounting  
569 for variance explained by the  $p$ -factor are presented in the **Online Supplement** (Figures S15-  
570 S20; Table S5). These results indicated slightly attenuated signal across enrichment categories  
571 relative to enrichment from the correlated factors model, with one important exception: the  
572 enrichment signal was even stronger in the  $PI \times$  neuronal annotations when examining the  
573 variance in the Psychotic disorders factor that was unique of the three remaining factors. This  
574 provides compelling evidence that variants within  $PI$  genes expressed in specific hippocampal  
575 and prefrontal cortex neuronal cells are distinctly important for genetic overlap between  $BIP$  and  
576  $SCZ$ .

577

### 578 **Unstructured Multivariate GWAS**

579

580 We went on to conduct an unstructured multivariate GWAS that computes an omnibus  
581 index of association across all 11 disorders. This GWAS was conducted within Genomic SEM  
582 by comparing a maximally complex model in which the SNP is allowed to have direct regression  
583 relations with each of the 11 disorders against a null model in which the SNP is associated with  
584 none of the disorders. This omnibus test is  $\chi^2$  distributed with 11  $df$ , and quantifies evidence for  
585 an overall effect of the SNP on any subset of the disorders, irrespective of the patterning or  
586 directionality of the effects. We refer to this as an unstructured multivariate GWAS because the  
587 tested model freely estimates as many SNP regressions as there are disorders, and can identify  
588 variants associated with a subset of the psychiatric disorders regardless of their loading on the  
589 higher order factors we observed.

590 The unstructured multivariate GWAS identified 184 associated loci, 39 of which were  
591 not in LD with any of the univariate associations (Figure 6 for Miami plots; Figure S21 for QQ-  
592 plots; Table S7 for individual hits). Of these 39 novel hits, nine have not been described for  
593 independent studies of psychiatric traits/symptoms and were largely characterized by hits  
594 previously found for cognitive (e.g., intelligence) or anthropometric traits (e.g., BMI; Table S7).  
595 Moreover, 7 hits were entirely novel in that they were not in LD with any previously discovered  
596 hits in the GWAS catalogue. For comparative purposes, we consider overlap with the 109  
597 pleiotropic and 146 total hits from PGC-CDG2<sup>13</sup> given both overlapping datasets and research  
598 questions. The unstructured multivariate GWAS recaptures 69 of the 109 (63.3%; Table S8)  
599 pleiotropic loci and 97 of the 146 (66.4%) total loci from PGC-CDG2 .

600

### 601 **Structured Multivariate GWAS**

602

603 We used Genomic SEM to perform two structured multivariate GWASs, one using the  
604 correlated factors model (with Factors 1-4 as the GWAS target), and one using the hierarchical  
605 factor model (with the higher order  $p$ -factor as the GWAS target; Figure 6). We refer to these  
606 multivariate GWASs as structured, because the different models used for each define a specific  
607 pattern, or *structure*, of the relationship between the SNP and the 11 disorders. For each of the  
608 two multivariate GWASs, and for each factor used as a GWAS target, we estimate SNP-specific  
609 indices of heterogeneity with the  $Q_{SNP}$ <sup>44</sup> statistic that indexes violation of the null hypothesis that  
610 the SNP acts on the individual disorders entirely via the factor on which they load (Figure 3; see  
611 **Method**). A  $Q_{SNP}$  statistic is typically significant when the SNP effect is highly specific to an  
612 individual disorder or when SNP effects are highly heterogeneous across disorders, such as when



613 there is divergent directionality across the disorders. Thus, we use these GWASs to identify  
614 whether variants specifically relate to broad-dimensions of genetic risk, or to a specific disorder  
615 or disorders. Corresponding results from using the genome-wide S-LDSC matrix can be found in  
616 Tables S27-S39 and Figures S22-S23. LDSC and S-LDSC produced highly similar multivariate  
617 GWAS results (Supplementary Results; Figures S24-25). Polar plots of individual variants  
618 estimated as genome-wide significant are presented in Figure S26.

619 We identified 1 hit for the Compulsive disorders factor, a locus also associated with AN<sup>16</sup>  
620 (Table S9-S10). We identify two loci for the Compulsive disorders factor-specific  $Q_{\text{SNP}}$  statistic  
621 (Table S11), including a locus (rs1906252) with strong opposing effects on AN and TS .

622 We identified 108 hits for the Psychotic disorders factor, 96 of which were in LD with  
623 previously reported associations with BIP<sup>45</sup> and SCZ (Table S12), and 12 of which were novel  
624 relative to the contributing univariate GWASs. Of these 12 unique hits, 8 have been reported as  
625 hits in independent (or semi-independent) external GWAS of psychiatric traits, 2 were novel for  
626 psychiatric traits, and 2 were entirely novel (Table S13). Psychotic disorders, factor-specific  
627  $Q_{\text{SNP}}$  statistic revealed 6 hits, 3 of which were in LD with hits for ALCH (Table S14), including a  
628 locus in the well-described Alcohol Dehydrogenase 1B (ADH1B) gene that was significant for  
629 factor-specific  $Q_{\text{SNP}}$  for all four factors.

630 We identified nine hits for the Neurodevelopmental disorders factor (Table S15), 3 of  
631 which were in LD with hits for ADHD<sup>14</sup> or MDD, and 2 of which were novel relative to the  
632 contributing univariate GWASs. These two novel hits were in LD with hits previously described  
633 for GWAS of psychiatric traits (Table S16). There were 7 hits for the Neurodevelopmental  $Q_{\text{SNP}}$   
634 statistic, many of which appeared to be specific to AUT<sup>17</sup> (Table S17).

635 We identified 44 independent hits for the Internalizing disorders factor, 6 of which were  
636 unique of hits from the contributing univariate GWASs (Table S18). Among these 6 novel loci, 3  
637 were identified in outside studies of psychiatric traits, one has been identified for smoking  
638 initiation, and two have yet to be described for any trait (Table S19). Three loci were identified  
639 for the Internalizing factor-specific  $Q_{\text{SNP}}$  statistic, all three of which were in LD with hits for  
640 ALCH (Table S20). We note that the discrepancy in the number of univariate MDD hits (109)  
641 relative to the number of Internalizing factor hits (44) can be attributed to a combination of  
642 signal specific to MDD and splitting the MDD signal across two factors (Figure S27).

643 Of the 109 pleiotropic hits from PGC-CDG2, none were in LD with hits for the  
644 Compulsive disorders factors, 52 hits were in LD with hits for the Psychotic disorders factor, 4  
645 hits were in LD with hits for the Neurodevelopmental disorders factor, and 14 hits were in LD  
646 with hits for the Internalizing disorders factor. As 5 of these overlapping hits were redundant  
647 across the factors, the correlated factors model indicates that 65 of the 109 (59.6%) PGC-CDG2  
648 hits may be interpreted as acting pleiotropically via the factors identified here. Nine hits from the  
649 correlated factors model were in LD across the factors, and 1 hit was in LD with a  $Q_{\text{SNP}}$  hit. In  
650 total, we therefore discover 152 independent loci that are likely to operate through pleiotropic  
651 mechanisms, 20 of which that were novel relative to the univariate traits. Accounting for LD  
652 across factor-specific  $Q_{\text{SNP}}$  hits, we identify nine independent  $Q_{\text{SNP}}$  hits that do not conform to  
653 the identified factor structure (Table 1), a third of which appeared to operate through pathways  
654 unique to ALCH.

655 We identified only 2 genome-wide hits for the higher-order  $p$ -factor, both of which were  
656 in LD with univariate hits for MDD and SCZ (Table S21), and have been described in multiple  
657 external GWAS of psychiatric traits (Table S22). The  $p$ -factor was characterized by the highest  
658 level of heterogeneity by far, with 69 loci identified for  $Q_{\text{SNP}}$  (Table S23), 49 of which were in

659 LD with hits on the four psychiatric factors from the correlated factors model. Despite few hits  
660 for  $p$ , its considerable mean  $\chi^2$  (1.795) may be attributable to the aggregation of heterogenous  
661 signal across factors 1-4 in the hierarchical factor GWAS.

662 In summary, very few SNPs act on these 11 disorders in a manner consistent with the  
663 presence of a  $p$ -factor, whereas many SNPs act on the 11 disorders according to patterns that are  
664 significantly inconsistent with the presence of a  $p$ -factor. Moreover, the high average mean  $\chi^2$   
665 for the  $p$ -factor suggest that the paucity of factor hits is not attributable to low power. The  
666 observed pattern of SNP effects, in combination with the extensive heterogeneity in the pattern  
667 of correlations with biobehavioral traits reported earlier, suggests that a single, higher-order  
668 common factor of genetic risk for psychiatric disease has low plausibility and little pragmatic  
669 utility for understanding the shared genetic architecture of the disorders.

670

### 671 **Post-hoc Multivariate GWAS: Bifactor Specification of $p$**

672

673 An alternative approach to modelling the  $p$ -factor is to specify a bifactor model.<sup>6,7</sup> In the  
674 bifactor model, the  $p$ -factor and four domain-specific factors are specified to be orthogonal to  
675 one another and to directly predict the 11 disorders (Figure 1d). In contrast to the hierarchical  
676 model in which the relationship between  $p$  and the 11 disorders is mediated by the four lower-  
677 order factors, the bifactor model allows for direct associations between  $p$  and the 11 disorders.  
678 As the hierarchical model reflects a constrained version of the bifactor model, the bifactor model  
679 is always able to approximate the empirical genetic covariance as well as, or better than, the  
680 hierarchical model.<sup>46</sup> Indeed, the bifactor model fit the data very well ( $\chi^2[28] = 120.35$ , AIC =  
681 196.35, CFI = .982, SRMR = .062). Multivariate GWAS results using the bifactor model are  
682 presented here in order to more fully consider the utility of a  $p$ -factor, but are treated as  
683 exploratory and post-hoc.<sup>46</sup>

684 A multivariate GWAS with the bifactor  $p$ -factor as the GWAS target identified 66  
685 independent hits, including the two hits for the hierarchical  $p$ -factor (Table S24). Among these  
686 66 hits, 38 were in LD with hits from the correlated factors model, 8 hits were novel relative to  
687 univariate hits, and 7 hits were novel relative to both univariate or correlated factors hits. Three  
688 hits were novel for psychiatric traits more generally (Table S25). We identified 76  $Q_{\text{SNP}}$  hits, 50  
689 of which were in LD with hierarchical  $p$   $Q_{\text{SNP}}$  hits (Table S26). Although the bifactor  
690 specification of  $p$  produced more factor hits than did the hierarchical specification, the pattern of  
691 results with respect to the large number of  $Q_{\text{SNP}}$  hits and high overall mean  $\chi^2$  of  $Q_{\text{SNP}}$  was  
692 similar, and the LDSC genetic correlation across these two specifications of  $p$  was  $> .99$ .  
693 Collectively, these results indicate low utility of the  $p$ -factor for either the bifactor or hierarchical  
694 specification.

695

696

697

698

699

700

701

702 Table 1. Genome-wide Multivariate GWAS Results

| Multivariate GWAS Target                | Effective <i>N</i>                   | Mean $\chi^2(1)$ | LDSC Univariate Intercept | Independent Hits (LD with Q hits) | LD with Univariate Trait Hits (LD with Q hits) | Unique from Univariate Trait Hits (LD with Q hits) |
|-----------------------------------------|--------------------------------------|------------------|---------------------------|-----------------------------------|------------------------------------------------|----------------------------------------------------|
| Multivariate GWAS                       |                                      |                  |                           |                                   |                                                |                                                    |
| Factor 1 (Compulsive)                   | 19,108                               | 1.209            | 0.973                     | 1 (0)                             | 1 (0)                                          | 0 (0)                                              |
| Factor 2 (Psychotic)                    | 87,138                               | 1.869            | 0.975                     | 108 (1)                           | 96 (1)                                         | 12 (0)                                             |
| Factor 3 (Neurodevelopmental)           | 55,932                               | 1.301            | 1.022                     | 9 (0)                             | 7 (0)                                          | 2 (0)                                              |
| Factor 4 (Internalizing)                | 455,340                              | 1.635            | 0.997                     | 44 (0)                            | 38 (0)                                         | 6 (0)                                              |
| Total hits across Factors 1-4           | -                                    | -                | -                         | 153 (1)                           | 133 (1)                                        | 20 (0)                                             |
| Hierarchical <i>p</i> factor            | 667,343                              | 1.795            | 0.955                     | 2 (1)                             | 1 (0)                                          | 1 (1)                                              |
| Bifactor <i>p</i> factor                | 666,557                              | 1.985            | 0.982                     | 66 (8)                            | 58 (8)                                         | 8 (0)                                              |
| Unstructured Meta-Analysis              | -                                    | 2.216            | 0.883                     | 184                               | 145 (-)                                        | 39 (-)                                             |
| Heterogeneity Index ( $Q_{SNP}$ )       |                                      |                  |                           |                                   |                                                |                                                    |
| Factor 1 (Compulsive) $Q_{SNP}$         | -                                    | 1.113            | 1.001                     | 2                                 | 1                                              | 1                                                  |
| Factor 2 (Psychotic) $Q_{SNP}$          | -                                    | 1.251            | 0.994                     | 6                                 | 4                                              | 2                                                  |
| Factor 3 (Neurodevelopmental) $Q_{SNP}$ | -                                    | 1.246            | 0.980                     | 7                                 | 4                                              | 3                                                  |
| Factor 4 (Internalizing) $Q_{SNP}$      | -                                    | 1.142            | 0.977                     | 3                                 | 3                                              | 0                                                  |
| Total $Q_{SNP}$ hits across Factors 1-4 | -                                    | -                | -                         | 9                                 | 5                                              | 4                                                  |
| Hierarchical <i>p</i> factor $Q_{SNP}$  | -                                    | 1.667            | 0.928                     | 69                                | 58                                             | 11                                                 |
| Bifactor <i>p</i> factor $Q_{SNP}$      | -                                    | 1.645            | 0.936                     | 76                                | 59                                             | 17                                                 |
| Contributing Univariate GWAS            | Effective <i>N</i> (Total <i>N</i> ) | Mean $\chi^2(1)$ | LDSC Univariate Intercept | Independent Hits (LD with Q hits) | LD with Factor Hits (LD with Q hits)           | Unique from Factor Hits (LD with Q hits)           |
| AN                                      | 34,467 (72,517)                      | 1.297            | 1.020                     | 8 (0)                             | 1 (0)                                          | 7 (0)                                              |
| OCD                                     | 5,712 (9,725)                        | 1.062            | 0.993                     | 0 (0)                             | 0 (0)                                          | 0 (0)                                              |
| TS                                      | 9,614 (14,307)                       | 1.123            | 1.014                     | 1 (0)                             | 0 (0)                                          | 1 (0)                                              |
| SCZ                                     | 87,462 (130,644)                     | 2.118            | 1.077                     | 179 (2)                           | 89 (2)                                         | 90 (0)                                             |
| BIP                                     | 35,967 (51,710)                      | 1.396            | 1.020                     | 16 (0)                            | 9 (0)                                          | 7 (0)                                              |
| ALCH                                    | 155,698 (176,024)                    | 1.199            | 0.994                     | 6 (3)                             | 2 (1)                                          | 4 (2)                                              |
| ADHD                                    | 46,586 (115,673)                     | 1.221            | 0.969                     | 6 (0)                             | 3 (0)                                          | 3 (0)                                              |
| AUT                                     | 33,719 (46,351)                      | 1.198            | 1.008                     | 3 (1)                             | 0 (0)                                          | 3 (1)                                              |
| PTSD                                    | 22,001 (38,593)                      | 1.119            | 0.991                     | 0 (0)                             | 0 (0)                                          | 0 (0)                                              |
| MDD                                     | 498,520 (802,939)                    | 1.957            | 1.024                     | 109 (0)                           | 43 (0)                                         | 66 (0)                                             |
| ANX                                     | 30,273 (100,876)                     | 1.194            | 0.998                     | 2 (0)                             | 2 (0)                                          | 0 (0)                                              |

703 *Note.* Independent hits were defined using a pruning window of 250Kb and  $r^2 < 0.1$ . Hits are considered in LD if their LD was  $R^2 > .10$  or within a  
704 250Kb window of one another. Values in parentheses indicate whether any of the hits were in LD with hits for factor-specific  $Q_{SNP}$  hits from the  
705 respective model. Factor-specific  $Q_{SNP}$  indexes whether a particular SNP is unlikely to operate through the identified factor structure, as will often be  
706 the case when a SNP effect is highly specific to an individual disorder. To facilitate comparison across mean  $\chi^2$  values reported in each row, all  $\chi^2$   
707 statistics with  $df > 1$  (i.e. those for  $Q_{SNP}$  and those for the unstructured multivariate GWAS) were converted to  $\chi^2(1)$  statistics before taking their means.  
708 Effective sample size ( $N$ ) was estimated using the procedure outlined in the online supplement of Mallard et al. (2019).<sup>47</sup>

709

710

711

712

713

714

## Stratified Genomic SEM

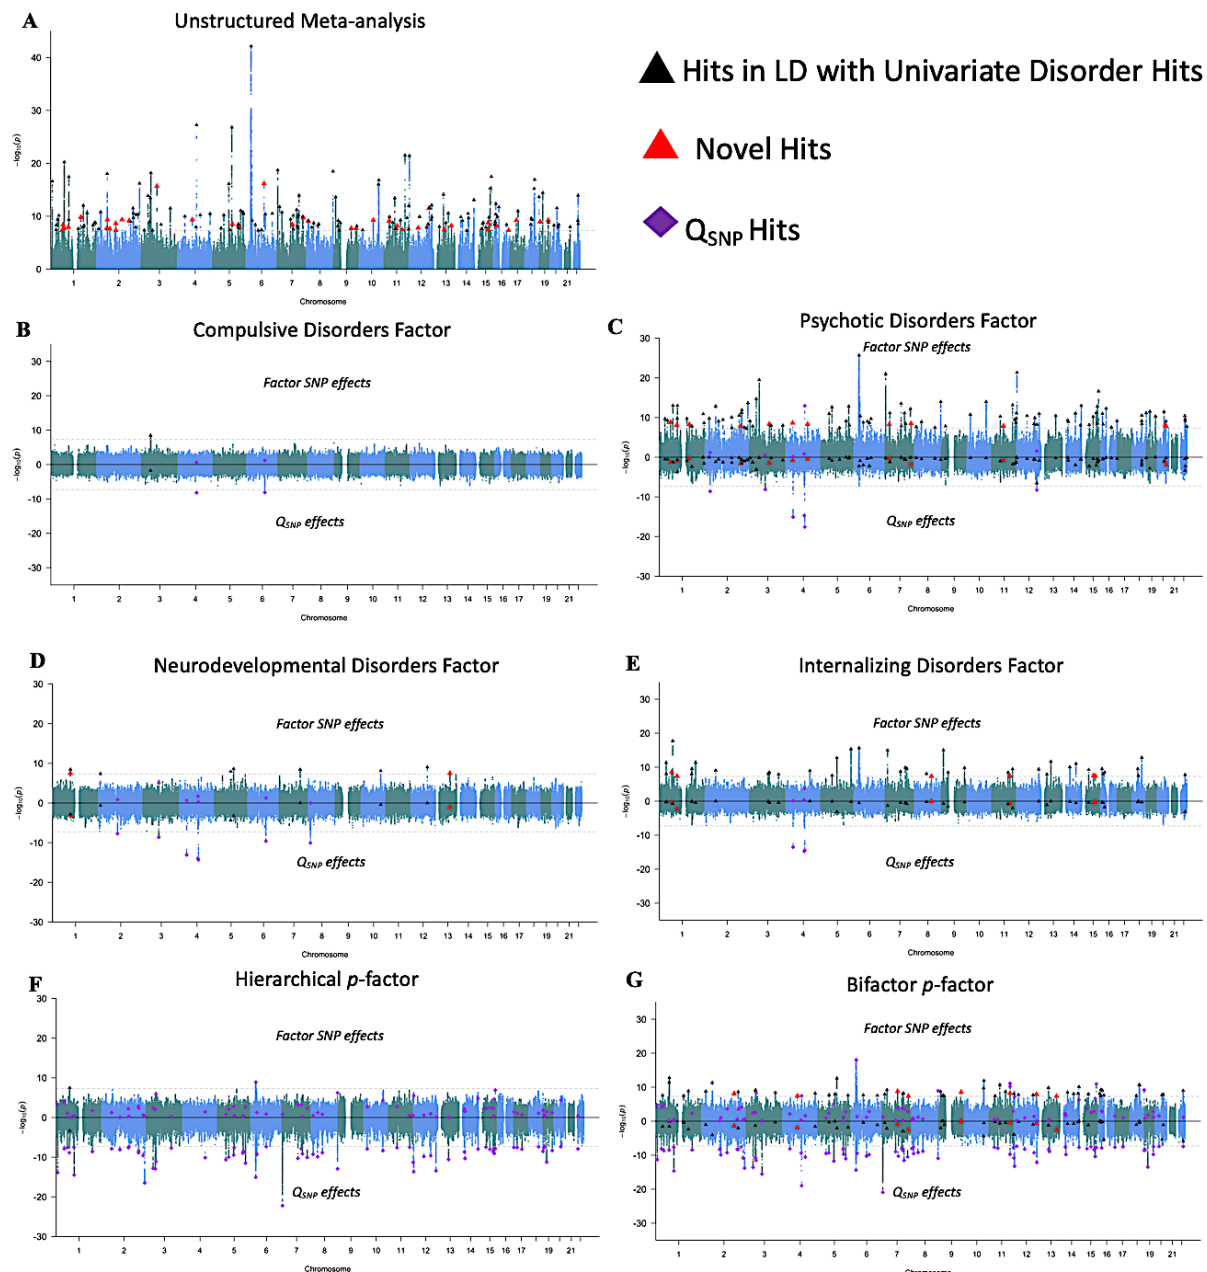

**Figure 6. Miami Plots for Psychiatric Factors.** Panel A depicts results from an unstructured meta-analysis of the 11 psychiatric traits (Panel A). Results from the correlated factors model are depicted for the Compulsive disorders factor (Factor 1; Panel B), Psychotic disorders factor (Factor 2; Panel C), Neurodevelopmental disorders factor (Factor 3; panel D), and Internalizing disorders factor (Factor 4; Panel E). Panel F depicts the results of the SNP effect on the second-order  $p$ -factor from the hierarchical model. Panel G depicts results from a model in which the SNP predicted the  $p$ -factor from a bifactor model. The top half of the plots depict the  $-\log_{10}(p)$  values for SNP effects on the factor; the bottom half depicts the  $\log_{10}(p)$  values for the factor specific  $Q_{SNP}$  effects. As the omnibus meta-analysis does not impose a structure on the patterning of SNP-disorder associations, it does not have a  $Q_{SNP}$  statistic. The gray dashed line marks the threshold for genome-wide significance ( $p < 5 \times 10^{-8}$ ). Black triangles denote independent factor hits that were in LD with hits for one of the univariate indicators and were not in LD with factor-specific  $Q_{SNP}$  hits. Large red triangles denote novel loci that were not in LD with any of the univariate GWAS or factor-specific  $Q_{SNP}$  hits. Purple diamonds denote  $Q_{SNP}$  hits.

715  
716  
717  
718  
719  
720  
721  
722  
723  
724  
725  
726  
727  
728  
729  
730  
731  
732  
733  
734  
735  
736  
737  
738  
739  
740  
741  
742  
743  
744  
745  
746  
747  
748  
749  
750  
751  
752  
753  
754  
755  
756  
757  
758  
759  
760  
761  
762  
763

764 **Estimating Causal Effects of Problematic Alcohol Use on Psychiatric Disease Risk**

765

766 One third of the  $Q_{\text{SNP}}$  discoveries from the correlated factors model appeared to operate  
767 through pathways unique to ALCH. This observation motivated an examination of the causal  
768 effects of ALCH on the disorders and factors using a form of multi-trait Mendelian  
769 randomization (MR) within the Genomic SEM framework. We ran two types of MR models: one  
770 using the  $Q_{\text{SNP}}$  variant in the ADH1B gene as a single instrumental variable for ALCH, and a  
771 second multi-variant MR approach using 8 loci identified from an independent ALCH discovery  
772 GWAS as instrumental variables.<sup>48</sup> The multi-variant approach allowed for pleiotropic effects of  
773 the loci on additional disorders or factors where appropriate (Supplementary Results). Results  
774 from the ADH1B and multi-variant Genomic SEM-MR approaches tentatively supported a  
775 causal effect of ALCH on MDD and BIP (Supplementary Results; Figures S28-29). In these  
776 models, ALCH loadings on factors 2-4 were no longer significant, but the remaining disorders  
777 continued to load significantly on their respective factors. This indicates that although ALCH  
778 may have causal effects on risk for at least two different disorders, multiple causation by ALCH  
779 alone is not sufficient to fully account for the widespread patterning of statistical pleiotropy  
780 observed among the remaining disorders examined here.

781

782

**Discussion**

783

784 We used genetic factor models to identify four broad factors (Neurodevelopmental,  
785 Compulsive, Psychotic, and Internalizing) that provide a reasonable model of the genetic  
786 correlations among 11 major psychiatric disorders, as estimated using the most recent GWAS  
787 summary data for individuals of European ancestry. We find that the Compulsive, Psychotic, and  
788 Internalizing factors are generally effective at describing the genetic relationship between  
789 psychiatric disorders at biobehavioral, functional genomic, and molecular levels of analysis.  
790 Results were less consistent with the utility of a Neurodevelopmental disorders factor. For  
791 example, numerous biobehavioral traits differed in their genetic correlations with AUT to the  
792 point where its disorder-specific etiology must diverge substantially from those of the other  
793 disorders loading on this factor. The Neurodevelopmental disorders factor also exhibited much  
794 higher degrees of heterogeneity with respect to associations with individual SNPs, suggesting  
795 few variants conferring risk for these disorders are likely to operate through a more general  
796 factor.

797

798 Although the genetic correlations among the 11 disorders were somewhat consistent with  
799 the concept of a general  $p$ -factor, a hierarchical factor model that specified such a  $p$ -factor was  
800 found to offer limited biological insight, obscuring patterns of genetic correlations with external  
801 biobehavioral traits, the enrichment of pleiotropy within specific biological annotations, and the  
802 associations with individual variants. A bifactor model identified a larger number of GWAS hits  
803 for  $p$ , but similar to the hierarchical model exhibited a great deal of SNP-level heterogeneity.  
804 Given that a  $p$ -factor was found to be insufficient for accounting for patterns of multivariate  
805 associations the question arises: What processes gives rise to the moderate genetic correlations  
806 observed among the four, first-order factors? One possibility is that genetic correlations among  
807 the four factors arise from shared biology underlying pairwise combinations of factors, and not  
808 from any biology that is shared across all factors. Similarly, genetic correlations among the  
809 factors themselves may reflect pairwise combinations of shared biology among disorders that are  
not shared across all disorders within a factor.



810 In some circumstances, genetic correlations across disorders may arise from direct,  
811 potentially mutual, causation between the factor or disorder-specific liabilities and one another<sup>49</sup>  
812 or reflect causation directly between the symptoms of different disorders.<sup>50</sup> Based on significant  
813 locus-specific violations of the four factor model at loci relevant to ALCH, including a locus in  
814 the ADH1B gene, we incorporated Mendelian randomization into Genomic SEM models in  
815 order to estimate the direct causal effect of ALCH on risk for the other disorders. Both single-  
816 and multi-variant MR indicated causal effects of ALCH on MDD and BIP. The capability to  
817 combine MR and Genomic SEM in order to simultaneously model latent variables and direct  
818 effects between disorders vastly increases the scope of possible models that can be evaluated in  
819 future work.

820 In order to identify gene sets and categories in which pleiotropic risk variants for multiple  
821 disorders are disproportionately localized, we developed Stratified Genomic SEM, and applied it  
822 to 168 annotations, including 29 annotations representing protein-truncating variant (PTV)-  
823 intolerant (PI) genes, genes expressed in the human brain cells in the hippocampus and prefrontal  
824 cortex, and their intersection. We find that the intersection between PI genes and genes expressed  
825 in both excitatory and GABAergic neurons explained an outsized proportion of the genetic  
826 variance in the Psychotic disorders factor, which primarily indexes genetic covariance between  
827 SCZ and BIP. This offers critical insight into increasingly specific classes of genes relevant to  
828 shared risk across two disorders with high genetic overlap. Across the four correlated factors, we  
829 find that conserved regions are generally enriched. As enrichment in conserved annotations has  
830 been previously reported for both psychiatric traits and a host of other complex traits (e.g.,  
831 cognitive function, anthropometric traits<sup>41,43</sup>), the current findings suggest that these annotations  
832 confer risk for individual disorders via highly pleiotropic variants relevant for many different  
833 domains of functioning.

834 It is important to note a number of limitations of the current analytic framework.  
835 Stratified Genomic SEM inherits the assumptions and limitations of traditional S-LDSC.<sup>33</sup> This  
836 includes using an additive model of gene action that does not consider the role of epistatic  
837 effects, and only modelling the covariance among relatively common variant SNPs for which LD  
838 information is available. In future work, larger univariate GWAS coupled with Stratified  
839 Genomic SEM would allow for fitting qualitatively distinct structural models for individual  
840 annotations. It is conceivable that a simpler two-factor model may best describe genetic  
841 covariance in evolutionarily conserved regions, whereas a five-factor model may reflect the  
842 underlying architecture in genes that are intolerant to protein truncation. The statistical tools  
843 developed here allow us to test such hypotheses by relaxing the assumption that a single  
844 structural model characterizes the genetic relationships across psychiatric disorders.

845 We also note that the pattern of results reported here is likely to have been influenced by  
846 the composition of the GWAS cohorts included. Summary statistics from well powered GWASs  
847 spanning the wide range of psychiatric disorders investigated here were only consistently  
848 available for individuals of European ancestry. A major priority for continued work in this area  
849 will be increase the diversity of populations for which psychiatric GWAS are available. Recently  
850 developed methods for the stratified analysis of genetic correlations across ancestral populations  
851 will be invaluable for the analysis of such data.<sup>51</sup>

852 Moreover, our results may have been influenced by the phenotyping and case-  
853 ascertainment methods used. For instance, we included data from have been  
854 influenced by the inclusion of GWAS cohorts relying primarily on self-report phenotypes,<sup>28</sup>  
855 though sensitivity analyses suggested minimal differences when excluding GWAS that used self-

856 report cohorts. Future analyses may benefit from evaluating these findings using a set of traits  
857 that is balanced with respect to statistical power. Future research may also benefit from further  
858 accounting for heterogeneity in how samples are ascertained and disorders are assessed.<sup>52</sup>  
859 Application of detailed and standardized assessment protocols to large, representative samples  
860 would of course be ideal. More pragmatically, future work may apply multivariate genetic  
861 approaches, such as those showcased here, at the level of individual symptoms.<sup>53</sup>

862 The current analyses revealed four, correlated psychiatric factors that account for  
863 extensive genetic overlap across disorders. We evaluate and elucidate the composition of these  
864 factors by demonstrating patterns of correlations with external traits, develop and apply a novel  
865 method, Stratified Genomic SEM, to identify classes of genes that explain disproportionate  
866 levels of genetic covariance, and identify sets of loci with ranging levels of pleiotropy. We also  
867 estimate MR models where pleiotropy is a function of both latent factors and direct effects from  
868 one disorder liability on another. Our results offer critical insight into shared and disorder  
869 specific mechanisms of genetic risk and suggest possible avenues for revising a psychiatric  
870 nosology currently defined largely by clinical observation. Evidence derived from multivariate  
871 genetic analysis, alongside evidence at other levels of explanation (e.g., cognitive neuroscience,  
872 neurochemistry, environmental stressors), could guide future diagnostic revision.

873

874  
875  
876  
877  
878  
879  
880  
881  
882  
883  
884  
885  
886  
887  
888  
889  
890  
891  
892  
893  
894  
895  
896  
897  
898  
899  
900  
901  
902  
903  
904  
905  
906  
907  
908  
909  
910  
911  
912  
913  
914  
915  
916  
917

## Method

### Overview of Genomic SEM and Stratified Genomic SEM

Genomic SEM is a two-stage Structural Equation Modelling approach. In the first stage, a genetic covariance matrix ( $S$ ) and its associated sampling covariance matrix ( $V_S$ ) are estimated with a multivariate version of LD Score regression (LDSC).  $S$  consists of heritabilities on the diagonal and genetic covariances (co-heritabilities) on the off-diagonal.  $V$  consists of squared  $SE$ s of  $S$  on the diagonal and sampling covariances on the off-diagonal, which capture dependencies between estimating errors that will arise in situations such as participant sample overlap across GWAS phenotypes. In the second stage, a structural equation model is fit to  $S$  by optimizing a fit function that minimizes the discrepancy between the model-implied genetic covariance matrix ( $\Sigma(\theta)$ ) and  $S$ , weighted by the elements within  $V$ . We use the diagonally weighted least squares (WLS) fit function described in Grotzinger et al. (2019):<sup>44</sup>

$$F_{WLS}(\theta) = (s - \sigma(\theta))' D_S^{-1} (s - \sigma(\theta))$$

where  $S$  and  $\Sigma(\theta)$  have been half-vectorized to produce  $s$  and  $\sigma(\theta)$ , respectively, and  $D_S$  is  $V_S$  with its off-diagonal elements set to 0. The sampling covariance matrix of the stage 2, Genomic SEM parameter estimates ( $V_\theta$ ) are obtained using a sandwich correction described in Grotzinger et al. (2019):<sup>44</sup>

$$V_\theta = (\hat{\Delta}'\Gamma^{-1}\hat{\Delta})^{-1} \hat{\Delta}'\Gamma^{-1}V_S\Gamma^{-1}\hat{\Delta}(\hat{\Delta}'\Gamma^{-1}\hat{\Delta})^{-1}$$

where  $\hat{\Delta}$  is the matrix of model derivatives evaluated at the parameter estimates,  $\Gamma$  is the stage 2 weight matrix,  $D_S$ , and  $V_S$  is the sampling covariance matrix of  $S$ .

Stratified Genomic SEM extends this framework by allowing potentially different structural equation models to be fit to genetic covariance matrices estimated in different gene sets and categories. These gene sets and categories, collectively referred to as annotations, can be constructed based on a variety of sources, such as collateral gene expression data obtained from single-cell RNA sequencing. We develop a multivariate extension of Stratified LD Score Regression (S-LDSC)<sup>33</sup> below to estimate these annotation-specific genetic covariance matrices and their associated sampling covariance matrices. We describe two types of annotation-specific genetic covariance matrices,  $S_\theta$  and  $S_\tau$ .  $S_\theta$  contains estimates of genetic covariance within a specific annotation without controlling for overlap with other annotations. In other words, it is composed of the zero-order coefficients implied by the multivariate S-LDSC model.  $S_\tau$  contains estimates of genetic covariance controlling for annotation overlap. In other words, it is composed of multiple regression coefficients estimated by the multivariate S-LDSC model. The distinction between  $S_\theta$  and  $S_\tau$  directly parallels the distinction made in univariate S-LDSC<sup>33</sup> between overall heritability explained by an annotation and the incremental contribution of a partition to heritability beyond all other annotations considered. Note that the estimates required to populate elements of an overall genome-wide  $S$  matrix can be produced either from the zero-order annotation that includes all SNPs or by aggregating parameters corresponding to each annotation from the multivariate S-LDSC model.

918 Below, we validate via simulation that Stratified Genomic SEM produces unbiased model  
919 parameter estimates and *SEs*, and that model fit indices appropriately favor the population  
920 generating model within a given annotation. There are a wide array of research questions that can  
921 be asked using Stratified Genomic SEM. In this paper, we examine genetic enrichment of  
922 variance in psychiatric genetic factors across a broad range of annotations.  
923

## 924 **Multivariate Stratified LDSC**

925  
926 Under a multivariate extension of the S-LDSC model, the expected value of the product of  
927 *z* statistics for each pairwise combination of phenotypes for SNP *j* equals:

$$928 \quad E[z_{1j}z_{2j}] = \sqrt{N_1N_2} \sum_c \tau_c \frac{\ell(j,c)}{M_c} + \frac{\rho N_s}{\sqrt{N_1N_2}} + a$$

929 where  $N_i$  is the sample size for study *i*, *c* indexes a genomic annotation,  $M_c$  is the number of  
930 SNPs in annotation *c*,  $\ell(j,c)$  is the LD score of SNP *j* with respect to annotation *c* (that is, the sum  
931 of squared LD this SNP has with all SNPs in the annotation),  $\tau_c$  is a vector of free parameters  
932 used to compute the conditional contribution to heritability or coheritability (genetic covariance)  
933 in annotation *c*,  $N_s$  is the number of individuals included in both GWAS samples,  $\rho$  is the  
934 phenotypic correlation within the overlapping samples, and *a* is a term representing unmeasured  
935 sources of confounding such as shared population stratification across GWASs.<sup>54</sup> The inclusion  
936 the term  $M_c$  in the above equation produces LD scores ( $\frac{\ell(j,c)}{M_c}$ ) that are scaled relative to the size  
937 of the respective annotations, thereby allowing  $\tau_c$  to be interpreted on the same scale as genome-  
938 wide estimates of heritability and coheritability, rather than on a per SNP scale. Note that when  
939 the *z* statistics for the same phenotype is double entered on the left hand side of the above  
940 equation, such that  $E[z_{1j}z_{2j}]$  becomes  $E[\chi_j^2]$ , the equation reduces to the univariate S-LDSC  
941 model.<sup>9</sup>

942 Following Finucane et al. (2015),<sup>33</sup> the multivariate S-LDSC model is estimated by  
943 regressing the product of *z* statistics against the annotation-specific LD scores using a weighted  
944 regression model (see online supplement of Finucane et al., 2015,<sup>33</sup> for a description of how  
945 weights are calculated). Standard errors and dependencies among estimation errors (i.e.,  
946 sampling covariances) are estimated using a multivariate block jackknife. As sample overlap  
947 creates a dependency between *z* statistics for the two traits, thus increasing their products, the S-  
948 LDSC intercept ( $\rho N_s/\sqrt{N_1N_2} + a$ ) is affected, but the regression slope is unaffected, and the  
949 estimates of partitioned genetic covariance and their standard errors are not biased.  
950

## 951 **Derivation of $S_\tau$ and $S_\theta$**

952  
953  $S_{\tau,c}$  is a matrix containing estimates of genetic variance and covariance in annotation *c*,  
954 controlling for overlap with other annotations. It is composed of multiple regression coefficients,  
955  $\tau_c$ , estimated directly with the multivariate S-LDSC model by populating each of its cells with  
956 the corresponding  $\tau$  estimate from the multivariate S-LDSC model.

957  $S_{\theta,c}$  is a matrix containing estimates of genetic covariance in annotation *c*, without  
958 controlling for overlap with other annotations. The elements  $\zeta_c$  composing  $S_{\theta,c}$  can be derived  
959 from the  $\tau_c$  estimates from the multivariate S-LDSC model in combination with knowledge of

960 annotation overlap. Thus, the zero-order contribution of target annotation  $t$  to heritability or co-  
961 heritability is written as:

962

$$963 \quad \zeta_t = \sum_c \left( \frac{|C_c \cap C_t|}{|C_c|} \right) \tau_c$$

964

965 where  $|C_c \cap C_t|$  is the number of SNPs in annotation  $c$  that are also in target annotation  $t$ , and  
966  $|C_c|$  is the total number of SNPs in annotation  $c$  (alternatively expressed as  $M_c$ ), such that  
967  $\left( \frac{|C_c \cap C_t|}{|C_c|} \right)$  reflects the proportion of SNPs in annotation  $c$  that are also in target annotation  $t$ . This  
968 proportion is used to weight the term  $\tau_c$  for each annotation in deriving the zero-order  
969 contribution of target annotation  $t$  to heritability or coheritability.

970 When the multivariate S-LDSC model is correct,  $S\tau$  is expected to produce unbiased  
971 estimates of the conditional contribution of an annotation to genetic covariance, after controlling  
972 for the effects of variants in all other annotation (i.e., accounting for the fact that variants can  
973 reside in multiple annotations). In comparison,  $S_0$  is expected to produce unbiased estimates of  
974 the total contribution of all genetic variants in an annotation to genetic covariance (i.e.,  
975 irrespective of its overlap with the other annotations).  $S_0$  has two desirable properties. First, its  
976 estimate is not as directly contingent on which other annotations are included in the multivariate  
977 S-LDSC model. Second, because it does not decompose contributions of an annotation into those  
978 that are shared vs. unique of other annotations, it is expected to produce more stable estimates at  
979 small and moderate sample sizes. For this reason, the empirical Stratified Genomic SEM  
980 analyses reported here employ  $S_0$  matrices, and should be interpreted accordingly.

981

## 982 **Simulations of Stratified Genetic Covariance**

983

984 *Simulation Procedure.* Using raw individual-level genotype data simulation, we sought to  
985 validate the point estimates and standard errors (*SEs*) produced by Stratified Genomic SEM. We  
986 compare results for  $S_0$  and  $S\tau$ . We began by generating 100 sets of 45, 100% heritable  
987 phenotypes (“orthogonal genotypes”) using the GCTA package.<sup>55</sup> Each 100% heritable  
988 phenotype was specified to have 10,000 randomly selected causal variants from within a  
989 particular annotation. These phenotypes were paired with genotypic data for 100,000 randomly  
990 selected, unrelated individuals of European descent from UKB data for the 1,209,498 SNPs  
991 present in HapMap3.

992 The simulated genotypes were used to construct six different factor structures for six  
993 causal annotations. All orthogonal genotypes were scaled  $M=0$ ,  $SD=1$ . For three of the causal  
994 annotations (DHS Peaks, H3K27ac, and PromoterUSC) seven genotypes for each annotation  
995 were used to construct six new correlated genotypes, each as the weighted linear combination of  
996 a domain-specific genetic factor and a general genetic factor, which was constructed from the  
997 seventh genotype. For the remaining three causal annotations (FetalDHS, H3K9ac, and TFBS)  
998 eight genotypes for each annotation were used to construct two sets of three correlated genotypes  
999 for two correlated general genetic factors, constructed from the seventh and eighth genotypes. A  
1000 set of six “total” genotypes was created by summing a factor indicator genotype from each of the  
1001 six causal annotations. As each genotype within each annotation was specified to have 10,000



1002 causal SNPs, the “total” genotypes created as the sum of six annotation had 60,000 causal SNPs  
1003 in the population generating model.

1004 Phenotypes were subsequently constructed as the weighted linear combination of one of  
1005 the six “total” genotypes and domain-specific environmental factors (randomly sampled from a  
1006 normal distribution with  $M=0$ ,  $SD=1$ ). Heritabilities for phenotypes 1-6 were all set to  $h_k^2=60\%$ ,  
1007 such that the weights for the genotypes were  $\sqrt{h_k^2}$  and the weights for the environmental factors  
1008 were  $\sqrt{(1 - h_k^2)}$ . Each of the 600 phenotypes (100 sets of 6 phenotypes) was then analyzed as a  
1009 univariate GWAS in PLINK<sup>56</sup> to produce univariate GWAS summary statistics. The summary  
1010 statistics were then munged, and Stratified Genomic SEM using the 1000 Genomes Phase 3  
1011 BaselineLD Version 2.2 model was used to construct 100 sets of  $6 \times 6$  stratified zero-order  
1012 genetic covariance matrices ( $S_0$ ),  $\tau$  covariance matrices ( $S_\tau$ ), and their corresponding sampling  
1013 covariance matrices ( $V_{S_0}$  and  $V_{S_\tau}$ ).

1014  
1015 *Validating  $S_0$  and  $V_{S_0}$ .* For the zero-order genetic covariance matrix, we would expect the  
1016 annotation including all SNPs—i.e. the genome-wide annotation—to reflect the weighted linear  
1017 combination of the generating covariance matrices specified for the six causal annotations, with  
1018 weights equal to the proportion of all SNPs contained in each of the corresponding causal  
1019 annotations. For each of the six causal annotations, we expect the zero-order covariance matrix  
1020 for the corresponding annotation to be a linear combination of that annotation’s population-  
1021 generating matrix and the remaining annotations’ population-generating matrices weighted by  
1022 the proportion of SNPs overlapping across the annotations. To test these expectations, we created  
1023 average observed covariance matrices across the 100 simulations for the genome-wide  
1024 annotation and six causal annotations. The estimated  $S_0$  genome-wide covariance matrix  
1025 approximately reflected an additive mixture of the six population generating covariance matrices,  
1026 and was estimated with minimal bias (absolute value of mean discrepancy = .004; Figure S30b).  
1027 In addition, the observed covariance matrices for each of the causal annotations were minimally  
1028 biased relative to the generating population (Figure S30, Table S40).

1029 In order to evaluate the accuracy of the  $SE$ s, we analyzed the ratio of the mean  $SE$   
1030 estimate across the 100 simulations over the empirical  $SE$  (calculated as the standard deviation of  
1031 the parameter estimates across the 100 simulations). A value above 1 for this ratio indicates  
1032 conservative  $SE$  estimates. This ratio was calculated within each of the annotations and for each  
1033 cell of the covariance matrix. The average ratio across annotations and cells of the covariance  
1034 matrix was 1.030 (Figure S31 for distribution across all annotations; Table S40 for ratio within  
1035 causal annotations). Thus, we have produced a  $SE$  estimate for stratified heritability and  
1036 covariance that performs as expected. In fact, our estimates are very slightly *conservative* as the  
1037 mean  $SE$  was slightly larger than the empirical  $SE$ . Moreover, the average  $z$  statistic for  
1038 heritability and covariance estimates within the causal annotations were all highly significant,  
1039 suggesting more than adequate power under the conditions of the current simulation (Table S40).

1040  
1041 *Validating  $S_\tau$  and  $V_{S_\tau}$ .* The expectation for the genetic  $S_\tau$  covariance matrices is that the observed  
1042 covariance matrices will reflect the generating model within only that annotation. Indeed, the  
1043 causal annotations closely matched their respective population generating covariance matrices  
1044 and bias was minimal (Table S40; Figure S32). We then analyzed the ratio of the mean  $SE$   
1045 estimate across the 100 runs over the empirical  $SE$  (calculated as the standard deviation of the  
1046 parameter estimates across the 100 runs). The average ratio of  $SE$  estimates was 1.014 across all  
1047 annotations (Figure S31) and, importantly, was also close to 1 for the causal annotations (Table



1048 S40). Results for 4,459 of the total 5,300 covariance matrices produced negative heritability  
1049 estimates. This included some of the causal annotations (Table S30), but was largely true for the  
1050 non-causal annotations. Negative heritability estimates are unsurprising for the non-causal  
1051 annotations as their population generating effect is 0. The  $z$  statistics for the  $S_\tau$  heritabilities and  
1052 covariances were, on average, smaller relative to the  $S_\theta$  covariance matrices (Table S40). This is  
1053 to be expected as the  $S_\theta$  covariance matrices include power gained from variance shared with  
1054 overlapping annotations.

1055 The  $S_\tau$  covariance matrices for the causal annotations were then used as input for  
1056 Genomic SEM models. The two types of population generating models—a common factor and  
1057 correlated factors model—were run for each annotation. For all causal annotations, Genomic  
1058 SEM estimates closely matched the parameters specified in the generating population (Figure  
1059 S33). In addition, the ratio of the mean model  $SE$ s over the empirical  $SE$ s was near 1. Model fit  
1060 statistics (CFI, AIC, and model  $\chi^2$ ) also generally favored the generating model for a particular  
1061 annotation (Table S41). This was least true for the H3K27ac annotation. This is unsurprising as  
1062 the population generating model for the H3K27ac annotation—a correlated factors model with a  
1063 factor correlation of .7—most closely matched the competing common factor model.  
1064 Collectively, these results indicate that stratified Genomic SEM produces unbiased parameter  
1065 estimates and standard errors for  $S_\theta$  and  $S_\tau$ , that  $S_\tau$  shows specificity to the causal annotations of  
1066 interest, and that model fit indices generally favor the appropriate model.  
1067

## 1068 **Psychiatric Phenotypes**

1069  
1070 We curated the largest and most recent GWAS summary data from individuals of  
1071 European ancestry for eleven major psychiatric disorders (Table S1). We refer the reader to the  
1072 original articles for the corresponding univariate GWAS for details about sample ascertainment,  
1073 quality control, and related procedures. For PTSD, MDD, ADHD, ANX, and ALCH, phenotype-  
1074 specific meta-analyses of GWAS summary data derived from two different contributing sources  
1075 per disorder were conducted in Genomic SEM so as to account for potentially unknown degrees  
1076 of participant overlap across contributing samples. Models were specified to be equivalent to a  
1077 fixed-effects meta-analysis, with both variables loading on the latent variable with an  
1078 unstandardized loading fixed to 1.0, and both residual variances fixed to 0. LDSC-estimated  
1079 genetic correlations within-phenotype-across-data-source were all  $\geq .6$  (Table S38). These  
1080 GWAS meta-analyses in Genomic SEM were highly genetically correlated ( $\geq .94$  as estimated  
1081 with LDSC) with those estimated in METAL,<sup>57</sup> which does not take sample overlap into account.  
1082 Consistent with the differences in whether sample overlap is considered, Genomic SEM and  
1083 METAL yielded univariate LDSC intercepts slightly below and slight above 1, respectively.

1084 For the five meta-analyzed traits (Table S42) we provide Manhattan plots, tables of  
1085 independent loci, and tables of hits that are in LD with hits previously identified in the GWAS  
1086 catalogue (Figure S34; Table S43-S50). We find that many of the identified loci have been  
1087 previously reported for the same or overlapping traits. As expected, the results for MDD and  
1088 ADHD also overlap strongly with findings from the most recent MDD<sup>58</sup> and ADHD<sup>14</sup> papers that  
1089 use highly similar samples to those that contributed summary data analyzed here. The observed  
1090 differences are attributable to different analytic pipelines and partially non-overlapping  
1091 contributing cohorts; for example, results reported from the published GWAS of ADHD<sup>14</sup>  
1092 include non-European samples, and hold some cohorts out for independent follow-up analyses.

1093 While conducting this project the more recent PGC Freeze 2 release of PTSD became  
1094 available.<sup>59</sup> However, the GWAS  $z$  statistics and heritability estimates for PTSD Freeze 2 were  
1095 lower than were observed for PTSD Freeze 1. As a result, our attempts to incorporate the PTSD  
1096 Freeze 2 summary data produced a variety of technical problems (e.g. out of bounds genetic  
1097 correlations and small heritability estimates). We therefore report results based on PTSD Freeze  
1098 1 summary data.

1099

## 1100 **Investigation of Genome-Wide Factor Structure**

1101

1102 In order to explore the full-scope of factors solutions, EFAs were conducted using the  
1103 *factanal* R package for two to five factor solutions using both oblique rotations, which allow for  
1104 correlations among the latent factors, and orthogonal rotations, which assumes factors are  
1105 independent (i.e., uncorrelated). Orthogonal rotations were examined as we, in part, sought to  
1106 identify maximally separable dimensions with distinct sets of psychiatric indicators. EFAs were  
1107 conducted for the genetic correlation structure derived from odd autosomes only. Confirmatory  
1108 factor analyses (CFAs) specified on the basis of these EFAs were subsequently fit to a genetic  
1109 correlation matrix estimated using only even autosomes. Using odd and even autosome  
1110 covariance matrices for the exploratory and confirmatory models, respectively, provided a form  
1111 of cross-validation to guard against model overfitting. For comparative purposes, we also  
1112 consider model fit and final factor solutions for CFAs fit to the S-LDSC matrix (Figure S35).

1113 For the CFAs, factors were assigned to traits when their standardized loading exceeded  
1114 .35 in the corresponding EFAs, with two exceptions. First, for all EFAs with  $> 3$  factors, a factor  
1115 was identified with TS as its only indicator with standardized loading  $> .35$ . In the context of the  
1116 CFAs, assigning TS to all factors at once, or to one factor at a time, resulted in issues with model  
1117 convergence. Consequently, this final factor was removed in the CFA and TS was specified to  
1118 always load on the factor with the largest EFA loading (excluding the factor defined only by TS)  
1119 and models were compared where TS loaded onto one of the remaining factors. Among these  
1120 combinations of TS models, a final model was selected using model fit indices (i.e., AIC,  
1121 SRMR, and CFI). Second, for certain EFA solutions, there were traits that did not meet the  
1122 standardized loading criteria of .35 for any factor. For these traits, we assigned factors to them in  
1123 the CFA when their standardized loading exceeded a more lenient threshold of 0.2. We then  
1124 inspected model fit indices for the follow-up CFA model to confirm that including those factor  
1125 loadings provided better fit to the data.

1126 All CFAs were fit using the Weighted Least Squares (WLS) estimator in the  
1127 *GenomicSEM* R package. CFAs based on orthogonal EFA results allowed for freely correlated  
1128 factors, as pruning factor loadings has the potential to reintroduce factor correlations. In the  
1129 context of the CFAs, we also considered a common factor model in which all 11 traits loaded  
1130 onto a single factor. CFAs with 4 correlated factors were similar in both factor structure and fit to  
1131 the data (Table S51). In addition, the CFAs with 4 correlated factors provided far superior fit to  
1132 the data (Figure S36), relative to the other models, with a number of the other CFAs failing to  
1133 converge. Moreover, as indicated by model fit statistics, and observed directly in genetic  
1134 correlation heatmaps, the correlation structure implied by the model estimates was much closer  
1135 to the observed genetic correlations for these CFA solutions (Figure S37). The final model was  
1136 chosen as a four correlated factor CFA (Table S52) as this ultimately provided the best fit to the  
1137 data. Importantly, the model identified using a split of even and odd autosomes also fit the data  
1138 well when applied to the genome-wide matrix estimated using autosomes 1-22 for LDSC (Figure

1139 1b;  $\chi^2[33] = 161.66$ , AIC = 227.66, CFI = .975, SRMR = .072) and S-LDSC (Figure S35e;  
1140  $\chi^2[33] = 89.63$ , AIC = 155.63, CFI = .976, SRMR = .086).

1141 The moderate factor correlations in this final model were also suggestive of a hierarchical  
1142 structure (Figure S36d). This provided relatively comparable fit to the data for the LDSC  
1143 genome-wide matrix (Figure 1c;  $\chi^2[35] = 171.37$ , AIC = 233.37, CFI = .974, SRMR = .079) and  
1144 S-LDSC genome-wide matrix (Figure 35G;  $\chi^2[35] = 91.83$ , AIC = 153.83, CFI = .976, SRMR =  
1145 .087). The absence of improved fit for the hierarchical model may reflect the fact that there was  
1146 observable bias when comparing the factor correlations from the non-hierarchical model against  
1147 the model implied correlations within the hierarchical model (Figure S37d).

1148

### 1149 **Genetic Correlations with Biobehavioral traits**

1150

1151 For biobehavioral traits, summary statistics for 49 phenotypes broadly related to various  
1152 domains of human health and well-being were downloaded from various online sources,  
1153 primarily sourced from GWAS Atlas.<sup>29</sup> For brain morphology, 101 summary statistics were  
1154 downloaded from the GitHub page that corresponds to the summary data produced by Zhao et al.  
1155 (2019).<sup>30</sup> For accelerometer data, 24 summary statistics for each hour of movement across the  
1156 day in UK Biobank were downloaded from the GCTA website.<sup>31</sup> All summary statistics were  
1157 cleaned and processed using the munge function of Genomic SEM, retaining all HapMap3 SNPs  
1158 outside of the major histocompatibility complex (MHC) regions with minor allele frequencies  
1159 (MAFs)  $\geq .01$ . To evaluate potential associations between the psychiatric genetic factors and  
1160 external traits, we used Genomic SEM to estimate genetic correlations between each of the four  
1161 psychiatric factors, the hierarchical  $p$ -factor, and all of the relevant traits.

1162

### 1163 **Selection and Creation of Annotations**

1164

1165 In order to construct the genome-wide S-LDSC matrix, and estimate stratified genetic  
1166 covariance, we utilized pre-computed annotation files provided by the original S-LDSC  
1167 authors.<sup>33</sup> In line with recommendations, we utilized all annotations from the most recent 1000  
1168 Genomes Phase 3 BaselineLD Version 2.2<sup>34</sup> that includes a total of 97 annotations ranging from  
1169 coding, UTR, promoter, and flanking window annotations. For tissue specific histone marks, we  
1170 included annotations constructed based on data from the Roadmap Epigenetics Project<sup>35</sup> for  
1171 narrowly defined peaks for DNase hypersensitivity, H3K27ac, H3K4me1, H3K4me3, H3K9ac,  
1172 and H3K36me3 chromatin. For tissue specific gene expression, we include annotations  
1173 constructed based on RNA sequencing data from human tissues from Genotype-Tissue  
1174 Expression (GTEx)<sup>36</sup> and for annotations constructed from human, mouse, and rat microarray  
1175 experiments from the Franke Lab (i.e., DEPICT).<sup>37</sup> For both tissue specific histone/chromatin  
1176 marks and gene expression we utilized only brain and endocrine relevant regions in addition to 5  
1177 randomly selected control regions from each (i.e., 10 controls total).

1178 We also created 29 annotations to examine the interaction between protein-truncating  
1179 variant (PTV)-intolerant (PI) genes and human brain cells. PI genes were obtained from the  
1180 Genome Aggregation Database (gnomAD), and ascertained using the probability of loss-of-  
1181 function intolerance (pLI) metric. We selected genes with pLI  $> 0.9$ , producing a list of 3063  
1182 genes.<sup>38</sup> Human brain cell gene sets were based on single-nucleus RNA-seq (sNuc-seq) data  
1183 generated GTEx project brain tissues in the hippocampus and prefrontal cortex.<sup>39</sup> Excluding  
1184 sporadic genes and genes with low expression, for the 14 cell types we selected the top 1600

1185 (~15%) differentially expressed genes in each cell type, which likely cover all genes that are  
1186 important for a specific cell type. PI × human brain cell gene sets contained the intersection of  
1187 genes that are PTV-intolerant and each human brain cell gene set. Annotations were created  
1188 using a 100kb window and LD information from the European subsample of 1000 Genomes  
1189 Phase 3.

1190 We do not estimate enrichment of psychiatric factors for continuous or flanking window  
1191 annotations, yielding a total of 168 binary annotations across the baseline model, gene  
1192 expression, histone marks, PI, and brain cell annotations. For a Bonferroni correction < .05 this  
1193 corresponds to  $p < 2.98E-4$ . We note that continuous and flanking window annotations were  
1194 retained for construction of the genome-wide, S-LDSC matrix.

### 1196 **Estimating Genetic Enrichment of Model Parameters**

1197  
1198 We can examine whether the proportional contribution of an annotation to a given  
1199 genome-wide parameter in Stratified Genomic SEM is different than would be expected on the  
1200 basis of the relative size of that annotation, so long as the parameter is scaled comparably across  
1201 all annotations considered.<sup>60</sup> This is formalized by testing the null hypothesis,

$$1203 \left( \frac{\theta_c}{\theta} \right) = \left( \frac{M_c}{M} \right),$$

1204 where  $\theta_c$  is the parameter estimate in annotation  $c$ , as estimated from a Genomic SEM model  
1205 applied to  $S_{\theta,c}$ ;  $\theta$  is the genome-wide parameter estimate, as estimated from a Genomic SEM  
1206 model applied to the genome-wide  $S$  matrix derived via aggregating the conditional contributions  
1207 of all annotations included in the multivariate S-LDSC model;  $M_c$  is the number of SNPs in  
1208 annotation  $c$ ; and  $M$  is the total number of SNPs. This formula can be rearranged to produce a  
1209 ratio of ratios (the so-called *enrichment ratio*) that indexes the magnitude of enrichment:

$$1210 \frac{\left( \frac{\theta_c}{\theta} \right)}{\left( \frac{M_c}{M} \right)},$$

1211 with a value of 1.0 corresponding to the null of no enrichment, values greater than 1.0  
1212 corresponding to enrichment (overrepresentation of signal in the annotation relative to its size),  
1213 and values below 1.0 corresponding to depletion (underrepresentation of signal in the annotation  
1214 relative to its size).

1215 In the current application, we are interested in enrichment of pleiotropic and disorder-  
1216 specific signal, as indexed by a factor model that allows the estimates of factor variances and  
1217 disorder-specific uniquenesses, respectively, to vary across annotations, while holding all factor  
1218 loadings invariant across annotations. We use a two-step model-fitting procedure to estimate the  
1219 enrichment ratio in order to directly obtain an estimate of its *SE*. In Step 1, we estimate the factor  
1220 loadings needed to scale the total genome-wide variances of the factors to 1.0. This is achieved  
1221 by fitting a model to the genome-wide S-LDSC matrix in which unit variance identification is  
1222 used. In Step 2, the loading estimates from the prior Step 1 model are fixed and the factor  
1223 variance is freely estimated separately in each annotation using the  $S_{\theta,c}$  matrices. Thus, the  
1224 estimated factor variances in Step 2 are scaled proportionally relative to the genome-wide factor  
1225 variance (i.e., the numerator of the enrichment ratio). This estimate and its *SE* are subsequently  
1226 divided by the proportion of SNPs in the corresponding annotation (i.e., the denominator of the  
1227 enrichment ratio). For clarification, we note that genome-wide enrichment across all SNPs is



1228 exactly equal to 1. That is, for Step 2, if the genome-wide S-LDSC matrix is used as input, this  
1229 produces a parameter estimate of 1, which is then divided by a proportion of 1.0, which reflects  
1230 the ratio of  $M/M$  (i.e., all SNPs over all SNPs).

1231

### 1232 **Q<sub>SNP</sub> Estimation**

1233

1234 Q<sub>SNP</sub> indexes violation of the null hypothesis that the SNP acts through a given factor. Put  
1235 another way, it quantifies whether the individual SNP is more likely to operate through the  
1236 common pathways of the psychiatric factors, or the independent pathways of individual  
1237 disorders. The index thereby identifies loci that do not plausibly operate on the individual  
1238 phenotypes exclusively by way of associations with common factor(s), and may be highly  
1239 specific to the individual disorder. In the context of the multivariate GWAS for the correlated  
1240 factors model, four separate follow-up models were estimated in which the SNP predicted three  
1241 of the overarching factors *and* the indicators of the remaining fourth factor (see Figure S38 for  
1242 path diagram). Comparing the model  $\chi^2$  between the model in which the SNP predicted all four  
1243 factors to one of these four, follow-up models produces a factor-specific Q<sub>SNP</sub>. For the  
1244 hierarchical factor structure, we compared the model  $\chi^2$  for a model in which the SNP predicted  
1245 only the second-order  $p$ -factor, to the model  $\chi^2$  for a model in which the SNP predicted only the  
1246 four, first-order psychiatric factors. For the bifactor model, we compared a model in which the  
1247 SNP predicted only the  $p$ -factor to a model in which the SNP predicted both the  $p$ -factor and  
1248 the remaining four orthogonal factors. For both the hierarchical and bifactor model, Q<sub>SNP</sub> indexes  
1249 heterogeneity at the level of the psychiatric factors (i.e., deviation from the null that the SNP  
1250 operates through the  $p$ -factor). Therefore, a significant Q<sub>SNP</sub> statistic for the hierarchical or  
1251 bifactor model is likely to identify loci that are specific to a subset of the psychiatric factor(s).  
1252 This is distinct from the interpretation of Q<sub>SNP</sub> in the context of the correlated factors model as a  
1253 significant hierarchical or bifactor Q<sub>SNP</sub> may still conform to the local structure of one of the  
1254 correlated factors.

1255

### 1256 **Quality Control Procedures**

1257

1258 *LD-Score Regression.* Quality control (QC) procedures for producing the genetic covariance ( $S$ )  
1259 and sampling covariance ( $V_S$ ) matrix followed the defaults in LDSC. This included removing  
1260 SNPs with an MAF < 1%, information scores (INFO) < .9, SNPs from the MHC region, and  
1261 filtering SNPs to HapMap3. The LD scores used for the analyses presented were estimated from  
1262 the European sample of 1000 Genomes, but restricted to HapMap3 SNPs as these tend to be  
1263 well-imputed and produce accurate estimates of heritability.

1264

1265 *Multivariate GWAS.* To obtain summary statistics for multivariate GWAS, we used the default  
1266 QC procedures in Genomic SEM of removing SNPs with an MAF < .005 in the 1000 Genomes  
1267 Phase 3 reference panel and SNPs with an INFO score < 0.6 in the univariate GWAS summary  
1268 statistics. These are currently the default QC procedures for the *GenomicSEM* R package. Using  
1269 these QC steps, there were 4,775,763 SNPs present across all eleven sets of European ancestry  
1270 summary statistics. Prior to running any multivariate GWAS, all summary statistics were  
1271 standardized with respect to the total variance in the outcome using the *sumstats* function in  
1272 *GenomicSEM* and corrected for genomic inflation using the conservative approach of by

1273 multiplying of the standard errors by the univariate LDSC intercept when the intercept was  
1274 above 1.

1275

### 1276 **Identification of Top Hits (Clumping) and Overlapping Hits**

1277         Lead SNPs for meta-analyzed univariate indicators and the latent genetic factors were  
1278 identified using the clumping and pruning algorithm in FUMA.<sup>61</sup> Independent significant SNPs  
1279 were defined as crossing the genome-wide significance threshold of  $p < 5e-8$  that were  
1280 independent from other SNPs at  $r^2 < 0.1$ . We used pre-calculated LD from European 1000  
1281 Genomes Phase 3 reference panel to identify independent SNPs. Top loci were subsequently  
1282 identified by merging any SNPs in close proximity ( $< 250$  kb) into a single genomic locus such  
1283 that an individual locus could include multiple independent SNPs at  $r^2 < 0.1$ . We depict only the  
1284 significant loci (referred to as hits throughout the paper) in the Miami plots, but report  
1285 independent significant SNPs in supplementary tables. This same pipeline was used for the full  
1286 set of univariate summary statistics (i.e., not listwise deleted across all 11 traits) in order to  
1287 produce a comparable set of loci for the univariate disorder GWAS. To determine overlap with  
1288 hits across the factors and disorders, we identified all independent SNPs for the psychiatric  
1289 factors that were in LD ( $r^2 < 0.1$ ) with independent SNPs for the individual disorders. As LD  
1290 structure can vary across different cohorts, we also considered hits to be overlapping (in LD) if  
1291 loci from the univariate disorder GWAS were within a 250 kb window (125 kb on either side of  
1292 the index variant) of loci identified for the psychiatric factors or omnibus test.

1293

1294

1295

1296

1297

1298

1299

1300

1301

1302

1303

1304

1305

1306

1307

1308

1309

1310

1311

1312

1313

1314

1315

1316

1317

1318



1319 **Code Availability**

1320 GenomicSEM software (which now includes the Stratified GenomicSEM extension), is an R  
1321 package that is available from GitHub at the following URL:

1322 <https://github.com/MichelNivard/GenomicSEM>

1323 Directions for installing the GenomicSEM R package can be found at:

1324 <https://github.com/MichelNivard/GenomicSEM/wiki>

1325

1326 **Data Availability**

1327 The data that support the findings of this study are all publicly available or can be requested for  
1328 access. Specific download links for various datasets are directly below.

1329 Summary statistics for data from the PGC can be downloaded or requested here:

1330 <https://www.med.unc.edu/pgc/download-results/>

1331 Summary statistics for the Anxiety phenotype in UKB (TotANX\_OR) can be downloaded here:

1332 [https://drive.google.com/drive/folders/1fguHvz7l2G45sbMI9h\\_veQun4aXNTy1v](https://drive.google.com/drive/folders/1fguHvz7l2G45sbMI9h_veQun4aXNTy1v)

1333 23andMe summary statistics are made available through 23andMe to qualified researchers under  
1334 an agreement with 23andMe that protects the privacy of 23andMe participants. Please visit  
1335 [research.23andme.com/collaborate/#publication](https://research.23andme.com/collaborate/#publication) for more information

1336 Summary statistics for the volume-based neuroimaging phenotypes were downloaded from:

1337 <https://github.com/BIG-S2/GWAS>

1338 Summary statistics for the health and well-being complex trait correlations can be downloaded  
1339 from: <https://atlas.ctglab.nl/>

1340 Summary statistics for the circadian rhythm correlations across 24-hours can be downloaded  
1341 from: <https://cnsgenomics.com/software/gcta/#DataResource>

1342 Data from gnomAD used to identify PI genes for creation of annotations can be downloaded  
1343 here: [https://storage.googleapis.com/gnomad-](https://storage.googleapis.com/gnomad-public/release/2.1.1/constraint/gnomad.v2.1.1.lof_metrics.by_gene.txt.bgz)

1344 [public/release/2.1.1/constraint/gnomad.v2.1.1.lof\\_metrics.by\\_gene.txt.bgz](https://storage.googleapis.com/gnomad-public/release/2.1.1/constraint/gnomad.v2.1.1.lof_metrics.by_gene.txt.bgz)

1345 Gene count data per cell for creation of annotations were obtained from:

1346 [https://storage.googleapis.com/gtex\\_additional\\_datasets/single\\_cell\\_data/GTEEx\\_droncseq\\_hip\\_p](https://storage.googleapis.com/gtex_additional_datasets/single_cell_data/GTEEx_droncseq_hip_pcf.tar)  
1347 [cf.tar](https://storage.googleapis.com/gtex_additional_datasets/single_cell_data/GTEEx_droncseq_hip_pcf.tar)

1348 Data which maps individual cells to cell types (e.g. neuron, astrocyte etc.) were obtained from:

1349 <https://static->

1350 [content.springer.com/esm/art%3A10.1038%2Fnmeth.4407/MediaObjects/41592\\_2017\\_BFnmeth](https://content.springer.com/esm/art%3A10.1038%2Fnmeth.4407/MediaObjects/41592_2017_BFnmeth)  
1351 [4407\\_MOESM10\\_ESM.xlsx](#)

1352 Links to the LD-scores, reference panel data, and the code used to produce the current results can  
1353 all be found at: <https://github.com/MichelNivard/GenomicSEM/wiki>

1354 Links to the BaselineLD v2.2 annotations can be found here:  
1355 <https://data.broadinstitute.org/alkesgroup/LDSCORE/>

1356

1357

1358

1359

1360

1361

1362

1363

1364

1365

1366

1367

1368

1369

1370

1371

1372

1373

1374

1375

1376

1377

1378

1379

1380

1381 **Acknowledgements**

1382 This work presented here would not have been possible without the enormous efforts put forth  
1383 by the investigators and participants from Psychiatric Genetics Consortium, iPSYCH, UK  
1384 Biobank, and 23andMe. The work from these contributing groups was supported by numerous  
1385 grants from governmental and charitable bodies as well as philanthropic donation. Research  
1386 reported in this publication was supported by the National Institute Of Mental Health of the  
1387 National Institutes of Health under Award Number R01MH120219. The content is solely the  
1388 responsibility of the authors and does not necessarily represent the official views of the National  
1389 Institutes of Health. ADG was additionally supported by NIH Grant R01HD083613. EMTD was  
1390 additionally supported by NIH grants R01AG054628 and R01HD083613 and the Jacobs  
1391 Foundation. EMTD is a faculty associate of the Population Research Center at the University of  
1392 Texas, which is supported by NIH grant P2CHD042849. MGN is additionally supported by  
1393 ZonMW grants 849200011 and 531003014 from The Netherlands Organisation for Health  
1394 Research and Development, a VENI grant awarded by NWO (VI.Veni.191G.030) and is a  
1395 Jacobs Foundation Fellow. WAA is supported by the "European Union's Horizon 2020 research  
1396 and innovation programme, Marie Skłodowska Curie Actions – MSCA-ITN-2016 – Innovative  
1397 Training Networks under grant agreement No [721567]". HFI is supported by the "Aggression in  
1398 Children: unraveling gene-environment interplay to inform Treatment and InterventiON  
1399 strategies" (ACTION) project. ACTION receives funding from the European Union Seventh  
1400 Framework Program (FP7/2007-2013) under grant agreement no 602768. CML is supported by  
1401 the National Institute for Health Research Biomedical Research Centre at South London and  
1402 Maudsley NHS Foundation Trust and King's College London. AMM is supported by the  
1403 Wellcome Trust (104036/Z/14/Z, 216767/Z/19/Z), UKRI MRC (MC\_PC\_17209,  
1404 MR/S035818/1). KPL is supported by the Deutsche Forschungsgemeinschaft (DFG: CRU 125,  
1405 CRC TRR 58 A1/A5, No. 44541416), the European Union's Seventh Framework Programme  
1406 under Grant No. 602805 (Aggressotype), the Horizon 2020 Research and Innovation Programme  
1407 under Grant No. 728018 (Eat2beNICE) and 643051 (MiND), Fritz Thyssen Foundation (No.  
1408 10.13.1185), ERA-Net NEURON/RESPOND, No. 01EW1602B, ERA-Net  
1409 NEURON/DECODE, No. FKZ01EW1902 and 5-100 Russian Academic Excellence Project. GB  
1410 is supported by the National Institute for Health Research Biomedical Research Centre at South  
1411 London and Maudsley NHS Foundation Trust and King's College London. PL is supported by  
1412 NIH R01MH119243 and R00MH101367.

1413

1414

1415

1416

1417

1418

1419

1420

1421

1422

1423 **Author Contributions**

- 1424 Study Design: Grotzinger, Nivard, Tucker-Drob  
1425 Methods Development: Grotzinger, Nivard, Tucker-Drob  
1426 Software Development: Grotzinger, Ip, Nivard, Tucker-Drob  
1427 Simulation Studies: Grotzinger, Nivard, Tucker-Drob  
1428 Gene Set and Annotation Creation: Akingbuwa, Grotzinger, Nivard  
1429 Genetic Factor Modelling, Multivariate GWAS, Complex Trait Correlations, and Multivariate  
1430 Enrichment Analyses: Grotzinger, Mallard, Nivard, Tucker-Drob  
1431 Writing: Grotzinger, Nivard, Tucker-Drob  
1432 Feedback and Editing: All authors contributed to editing the manuscript.

1433

1434 **Declaration of Interests**

- 1435 J.W.S. is an unpaid member of the Bipolar/Depression Research Community Advisory Panel of  
1436 23andMe. H.R.K. (Henry R. Kranzler) is a member of the American Society of Clinical  
1437 Psychopharmacology's Alcohol Clinical Trials Initiative, which was supported in the last three  
1438 years by AbbVie, Alkermes, Ethypharm, Indivior, Lilly, Lundbeck, Otsuka, Pfizer, Arbor, and  
1439 Amygdala Neurosciences. CML is on the SAB for Myriad Neuroscience. GB is a scientific  
1440 advisor for COMPASS Pathways. The other authors declare no competing interests.

## References

- 1441  
1442  
1443 1. Martel, M. M. *et al.* A general psychopathology factor (P factor) in children: structural  
1444 model analysis and external validation through familial risk and child global executive  
1445 function. *Journal of Abnormal Psychology* **126**, 137 (2017).  
1446 2. Dean, K. *et al.* The impact of parental mental illness across the full diagnostic spectrum on  
1447 externalising and internalising vulnerabilities in young offspring. *Psychological Medicine*  
1448 **48**, 2257–2263 (2018).  
1449 3. McLaughlin, K. A. *et al.* Parent psychopathology and offspring mental disorders: results  
1450 from the WHO World Mental Health Surveys. *The British Journal of Psychiatry* **200**,  
1451 290–299 (2012).  
1452 4. Kessler, R. C., Chiu, W. T., Demler, O. & Walters, E. E. Prevalence, severity, and  
1453 comorbidity of 12-month DSM-IV disorders in the National Comorbidity Survey  
1454 Replication. *Arch Gen Psychiatry* **62**, 617–627 (2005).  
1455 5. Caspi, A. & Moffitt, T. E. All for One and One for All: Mental Disorders in One  
1456 Dimension. *American Journal of Psychiatry* *appi.ajp.2018.1* (2018).  
1457 doi:10.1176/appi.ajp.2018.17121383  
1458 6. Caspi, A. *et al.* The p factor: one general psychopathology factor in the structure of  
1459 psychiatric disorders? *Clinical Psychological Science* **2**, 119–137 (2014).  
1460 7. Lahey, B. B. *et al.* Is there a general factor of prevalent psychopathology during  
1461 adulthood? *Journal of Abnormal Psychology* **121**, 971 (2012).  
1462 8. Pettersson, E., Larsson, H. & Lichtenstein, P. Common psychiatric disorders share the  
1463 same genetic origin: a multivariate sibling study of the Swedish population. *Molecular*  
1464 *Psychiatry* **21**, 717 (2016).  
1465 9. Bulik-Sullivan, B. K. *et al.* LD Score regression distinguishes confounding from  
1466 polygenicity in genome-wide association studies. *Nature Genetics* **47**, 291 (2015).  
1467 10. Selzam, S., Coleman, J. R., Caspi, A., Moffitt, T. E. & Plomin, R. A polygenic p factor for  
1468 major psychiatric disorders. *Translational Psychiatry* **8**, 205 (2018).  
1469 11. Lee, S. H. *et al.* Genetic relationship between five psychiatric disorders estimated from  
1470 genome-wide SNPs. *Nature Genetics* **45**, 984 (2013).  
1471 12. Anttila, V. *et al.* Analysis of shared heritability in common disorders of the brain. *science*  
1472 **360**, eaap8757 (2018).  
1473 13. Lee, P. H. *et al.* Genomic relationships, novel loci, and pleiotropic mechanisms across  
1474 eight psychiatric disorders. *Cell* **179**, 1469–1482. e11 (2019).  
1475 14. Demontis, D. *et al.* Discovery of the first genome-wide significant risk loci for attention  
1476 deficit/hyperactivity disorder. *Nature Genetics* **51**, 63 (2019).  
1477 15. Walters, R. K. *et al.* Transancestral GWAS of alcohol dependence reveals common  
1478 genetic underpinnings with psychiatric disorders. *Nature Neuroscience* **21**, 1656 (2018).  
1479 16. Watson, H. J. *et al.* Genome-wide association study identifies eight risk loci and  
1480 implicates metabo-psychiatric origins for anorexia nervosa. *Nature Genetics* **51**, 1207–  
1481 1214 (2019).  
1482 17. Grove, J. *et al.* Identification of common genetic risk variants for autism spectrum  
1483 disorder. *Nature Genetics* **51**, 431–444 (2019).  
1484 18. Otowa, T. *et al.* Meta-analysis of genome-wide association studies of anxiety disorders.  
1485 *Molecular Psychiatry* **21**, 1391 (2016).

- 1486 19. Purves, K. L. *et al.* A major role for common genetic variation in anxiety disorders.  
1487 *Molecular Psychiatry* 1–12 (2019).
- 1488 20. Stahl, E. A. *et al.* Genome-wide association study identifies 30 loci associated with  
1489 bipolar disorder. *Nature Genetics* **51**, 793–803 (2019).
- 1490 21. Wray, N. R. *et al.* Genome-wide association analyses identify 44 risk variants and refine  
1491 the genetic architecture of major depression. *Nature Genetics* **50**, 668 (2018).
- 1492 22. Howard, D. M. *et al.* Genome-wide association study of depression phenotypes in UK  
1493 Biobank identifies variants in excitatory synaptic pathways. *Nat Comms* **9**, 1470 (2018).
- 1494 23. Genetics, International Obsessive Compulsive Disorder Foundation *et al.* Revealing the  
1495 complex genetic architecture of obsessive–compulsive disorder using meta-analysis.  
1496 *Molecular Psychiatry* **23**, 1181 (2018).
- 1497 24. Meier, S. M. *et al.* Genetic variants associated with anxiety and stress-related disorders: a  
1498 genome-wide association study and mouse-model study. *JAMA psychiatry* **76**, 924–932  
1499 (2019).
- 1500 25. Duncan, L. E. *et al.* Largest GWAS of PTSD (N= 20 070) yields genetic overlap with  
1501 schizophrenia and sex differences in heritability. *Molecular Psychiatry* (2017).
- 1502 26. Ripke, S., Walters, J. T. & O'Donovan, M. C. Mapping genomic loci prioritises genes and  
1503 implicates synaptic biology in schizophrenia. *medRxiv* 2020.09.12.20192922 (2020).  
1504 doi:10.1101/2020.09.12.20192922
- 1505 27. Yu, D. *et al.* Interrogating the genetic determinants of Tourette's syndrome and other tic  
1506 disorders through genome-wide association studies. *American Journal of Psychiatry* **176**,  
1507 217–227 (2019).
- 1508 28. Cai, N. *et al.* Minimal phenotyping yields genome-wide association signals of low  
1509 specificity for major depression. *Nature Genetics* 1–11 (2020).
- 1510 29. Watanabe, K. *et al.* A global overview of pleiotropy and genetic architecture in complex  
1511 traits. *Nature Genetics* **51**, 1339–1348 (2019).
- 1512 30. Zhao, B. *et al.* GWAS of 19,629 individuals identifies novel genetic variants for regional  
1513 brain volumes and refines their genetic co-architecture with cognitive and mental health  
1514 traits. *bioRxiv* 586339 (2019).
- 1515 31. Jiang, L. *et al.* A resource-efficient tool for mixed model association analysis of large-  
1516 scale data. (2019).
- 1517 32. Karatsoreos, I. N. Links between circadian rhythms and psychiatric disease. *Frontiers in*  
1518 *behavioral neuroscience* **8**, 162 (2014).
- 1519 33. Finucane, H. K. *et al.* Partitioning heritability by functional annotation using genome-  
1520 wide association summary statistics. *Nature Genetics* **47**, 1228 (2015).
- 1521 34. Hujoel, M. L., Gazal, S., Hormozdiari, F., van de Geijn, B. & Price, A. L. Disease  
1522 heritability enrichment of regulatory elements is concentrated in elements with ancient  
1523 sequence age and conserved function across species. *The American Journal of Human*  
1524 *Genetics* **104**, 611–624 (2019).
- 1525 35. Kundaje, A. *et al.* Integrative analysis of 111 reference human epigenomes. *Nature* **518**,  
1526 317–330 (2015).
- 1527 36. Consortium, G. The Genotype-Tissue Expression (GTEx) pilot analysis: multitissue gene  
1528 regulation in humans. *science* **348**, 648–660 (2015).
- 1529 37. Pers, T. H. *et al.* Biological interpretation of genome-wide association studies using  
1530 predicted gene functions. *Nat Comms* **6**, 5890 (2015).



- 1531 38. Karczewski, K. J. *et al.* Variation across 141,456 human exomes and genomes reveals the  
1532 spectrum of loss-of-function intolerance across human protein-coding genes. *bioRxiv*  
1533 531210 (2019).
- 1534 39. Habib, N. *et al.* Massively parallel single-nucleus RNA-seq with DroNc-seq. *Nature*  
1535 *methods* **14**, 955–958 (2017).
- 1536 40. Ganna, A. *et al.* Quantifying the impact of rare and ultra-rare coding variation across the  
1537 phenotypic spectrum. *The American Journal of Human Genetics* **102**, 1204–1211 (2018).
- 1538 41. Gazal, S. *et al.* Linkage disequilibrium–dependent architecture of human complex traits  
1539 shows action of negative selection. *Nature Genetics* **49**, 1421 (2017).
- 1540 42. Schork, A. J. *et al.* A genome-wide association study of shared risk across psychiatric  
1541 disorders implicates gene regulation during fetal neurodevelopment. *Nature Neuroscience*  
1542 **22**, 353–361 (2019).
- 1543 43. Finucane, H. K. *et al.* Heritability enrichment of specifically expressed genes identifies  
1544 disease-relevant tissues and cell types. *Nature Genetics* **50**, 621 (2018).
- 1545 44. Grotzinger, A. D. *et al.* Genomic structural equation modelling provides insights into the  
1546 multivariate genetic architecture of complex traits. *Nature human behaviour* **3**, 513  
1547 (2019).
- 1548 45. Stahl, E. A. *et al.* Genome-wide association study identifies 30 loci associated with  
1549 bipolar disorder. *Nature Genetics* **51**, 793 (2019).
- 1550 46. Markon, K. E. Bifactor and hierarchical models: Specification, inference, and  
1551 interpretation. *Annual review of clinical psychology* **15**, 51–69 (2019).
- 1552 47. Mallard, T. T. *et al.* Not just one p: Multivariate GWAS of psychiatric disorders and their  
1553 cardinal symptoms reveal two dimensions of cross-cutting genetic liabilities. *bioRxiv*  
1554 603134 (2019).
- 1555 48. Kranzler, H. R. *et al.* Genome-wide association study of alcohol consumption and use  
1556 disorder in 274,424 individuals from multiple populations. *Nat Comms* **10**, 1–11 (2019).
- 1557 49. Epskamp, S., Rhemtulla, M. & Borsboom, D. Generalized network psychometrics:  
1558 Combining network and latent variable models. *Psychometrika* **82**, 904–927 (2017).
- 1559 50. Borsboom, D. A network theory of mental disorders. *World psychiatry* **16**, 5–13 (2017).
- 1560 51. Shi, H. *et al.* Population-specific causal disease effect sizes in functionally important  
1561 regions impacted by selection. *bioRxiv* 803452 (2019).
- 1562 52. Newson, J. J., Hunter, D. & Thiagarajan, T. C. The Heterogeneity of Mental Health  
1563 Assessment. *Frontiers in Psychiatry* **11**, 76 (2020).
- 1564 53. Thorp, J. G. *et al.* Genetic heterogeneity in self-reported depressive symptoms identified  
1565 through genetic analyses of the PHQ-9. *Psychological Medicine* 1–12 (2019).
- 1566 54. Yengo, L., Yang, J. & Visscher, P. M. Expectation of the intercept from bivariate LD  
1567 score regression in the presence of population stratification. *bioRxiv* 310565 (2018).
- 1568 55. Yang, J., Lee, S. H., Goddard, M. E. & Visscher, P. M. GCTA: a tool for genome-wide  
1569 complex trait analysis. *The American Journal of Human Genetics* **88**, 76–82 (2011).
- 1570 56. Purcell, S. *et al.* PLINK: a tool set for whole-genome association and population-based  
1571 linkage analyses. *The American Journal of Human Genetics* **81**, 559–575 (2007).
- 1572 57. Willer, C. J., Li, Y. & Abecasis, G. R. METAL: fast and efficient meta-analysis of  
1573 genomewide association scans. *Bioinformatics* **26**, 2190–2191 (2010).
- 1574 58. Howard, D. M. *et al.* Genome-wide meta-analysis of depression identifies 102  
1575 independent variants and highlights the importance of the prefrontal brain regions. *Nature*  
1576 *Neuroscience* **22**, 343 (2019).

- 1577 59. Nievergelt, C. M. *et al.* International meta-analysis of PTSD genome-wide association  
1578 studies identifies sex-and ancestry-specific genetic risk loci. *Nat Comms* **10**, 1–16 (2019).  
1579 60. Meredith, W. Measurement invariance, factor analysis and factorial invariance.  
1580 *Psychometrika* **58**, 525–543 (1993).  
1581 61. Watanabe, K., Taskesen, E., Van Bochoven, A. & Posthuma, D. Functional mapping and  
1582 annotation of genetic associations with FUMA. *Nat Comms* **8**, 1826 (2017).  
1583
